# Supplementary material for: Chiral microporous Ti(salan)-based metal–organic frameworks for asymmetric sulfoxidation
Source: Royal Society of Chemistry journal article supplement (doi:10.1039/c3cc43225d), 2013-01-01

## Chiral Microporous Ti(salan)-Based Metal-Organic Frameworks for Asymmetric Sulfoxidation

Chengfeng Zhu, Xu Chen, Zhiwei Yang, Xia Du, Yan Liu\* and Yong Cui\*

*School of Chemistry and Chemical Technology and State Key Laboratory of Metal  
Matrix Composites, Shanghai Jiao Tong University,  
Shanghai 200240, China;*

Email: [yongcui@sjtu.edu.cn](mailto:yongcui@sjtu.edu.cn)

### Table of Content

1. Materials and general procedures.
2. Synthesis of the ligand H<sub>5</sub>L, [TiL(Obu)<sub>2</sub>], **1** and **2**.
3. Experimental procedure and determination of enantiomeric purity for sulfoxides.
4. Table S1. Crystal data and structure refinement for **1** and **2**.
5. Table S2-S3. Selected Bond lengths and angles for **1** and **2**.
6. Figures S1-S6. Additional X-ray crystallographic structure of **1** and **2**.
7. Figure S7 TGA curves of **1** and **2**.
8. Figure S8. PXRD patterns of **1** and **2**.
9. Figure S9. CD spectra of (R)/(S)-**1** and (R)/(S)-**2**.
10. Figure S10. IR spectra of **1** and **2**.
11. Figure S11. <sup>1</sup>H and <sup>13</sup>C NMR for the H<sub>5</sub>L and related predecessors.
12. Figure S12. ESI-Mass of (R)-H<sub>5</sub>L.
13. Figure S13. Nitrogen sorption isotherm (77 K) of activated **1**.
14. Figure S14. ICP-OES data obtained from the filtrate after asymmetric sulfoxidation of methyl *p*-tolyl sulfide.
15. Figure S15. The HNMR spectra of sulfoxides.
16. Figure S16. The HNMR analyses of conversion and selectivity in the oxidation reaction of sulfides.
17. Figure S17. The HPLC analyses of sulfoxides.

## 1. Materials and General Procedures.

All of the chemicals are commercial available, and used without further purification. Elemental analyses of C, H and N were performed with an EA1110 CHNS-0 CE elemental analyzer. The IR (KBr pellet) spectra were recorded (400-4000  $\text{cm}^{-1}$  region) on a Nicolet Magna 750 FT-IR spectrometer. The solid state CD spectra were recorded on a J-800 spectropolarimeter (Jasco, Japan). Thermogravimetric analyses (TGA) were carried out in an nitrogen atmosphere with a heating rate of 10  $^{\circ}\text{C}/\text{min}$  on a STA449C integration thermal analyzer. Powder X-ray diffraction (PXRD) data were collected on a DMAX2500 diffractometer using Cu  $K\alpha$  radiation. The calculated PXRD patterns were produced using the SHELXTL-XPOW program and single crystal reflection data.  $^1\text{H}$  and  $^{13}\text{C}$  NMR experiments were carried out on a MERCURYplus 400 spectrometer operating at resonance frequencies of 400 MHz. Electrospray ionization mass spectra (ES-MS) were recorded on a Finnigan LCQ mass spectrometer using dichloromethane-methanol as mobile phase. A iCAP6300 inductively coupled plasma optical emission spectrometer(ICP-OES) was used to measure Ti and Cd concentrations. Analytical high performance liquid chromatography (HPLC) was performed on a YL-9100 HPLC with UV detection at 254 nm. Analytical CHIRALCEL OD-H and OD-H columns (4.6 mm  $\times$  25 cm) from Daicel were used.

**X-ray Crystallography.** Single-crystal XRD data for the compounds **1** and **2** were collected on a Bruker Smart 1000 CCD diffractometer with Cu- $K\alpha$  radiation ( $\lambda = 1.54178 \text{ \AA}$ ) at 100 K. The empirical absorption correction was applied by using the SADABS program (G. M. Sheldrick, SADABS, program for empirical absorption correction of area detector data; University of Göttingen, Göttingen, Germany, 1996). The structure was solved using direct method, and refined by full-matrix least-squares on  $F^2$  (G. M. Sheldrick, SHELXTL97, program for crystal structure refinement, University of Göttingen, Germany, 1997). In all compounds, the guest molecules and H-atoms were refined isotropically, while all other atoms were refined anisotropically. Crystal data and details of the data collection are given in Tables S1, while the selected bond distances and angles are presented in Tables S2-S3.

## 2. Synthetic Procedures of the ligand H<sub>5</sub>L, TiL(OBu)<sub>2</sub>, 1 and 2.

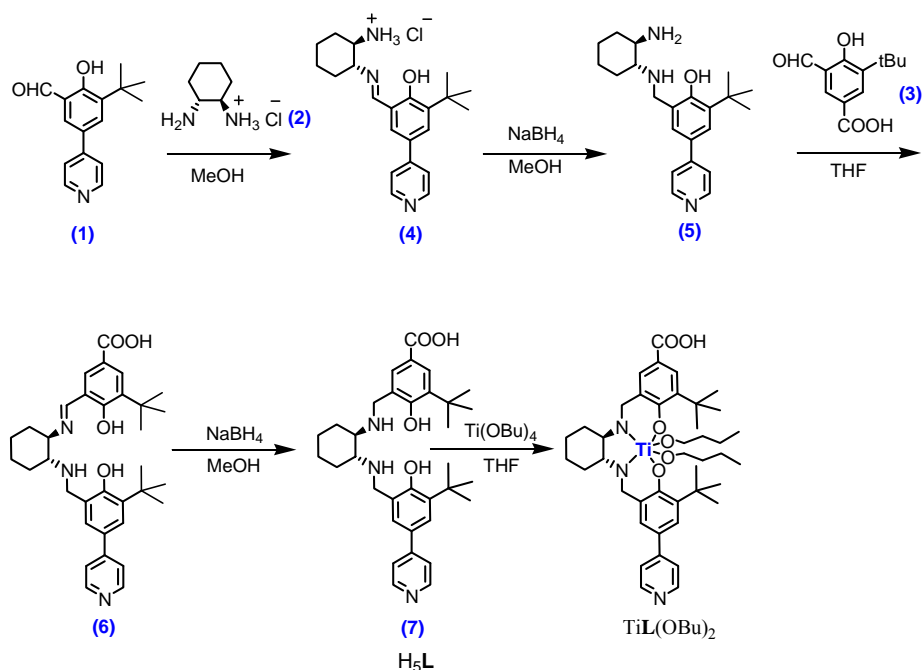

The synthetic routes of H<sub>5</sub>L and TiL(OBu)<sub>2</sub>.

### 2.1 Preparation of compound (1)

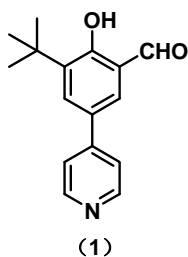

3-tert-butyl-2-hydroxy-5-(pyridin-4-yl)benzaldehyde was synthesized according to the literature (Morris, G. A.; Nguyen, S. T. *Tetrahedron Letters*. **2001**, 42, 2093-2096.)

### 2.2 Preparation of compound (2)

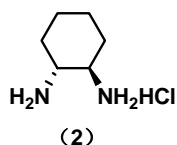

(1R,2R)-cyclohexane-1,2-diamine hydrochloride was synthesized according to the

the literature (Holbach, M.; Zheng, X.; Burd, C.; Jones, C. W.; Weck, M. *J. Org. Chem.* **2006**, *71*, 2903-2906.)

### 2.3 Preparation of compound (3)

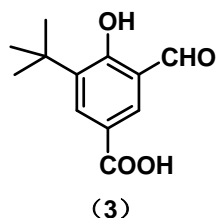

3-tert-butyl-5-formyl-4-hydroxybenzoic acid was synthesized according to the literature (Yuan, G.; Zhu, C.; Liu, Y.; Cui, Y. *Chem. Commun.* **2010**, *47*, 3180-3182).

### 2.4 Preparation of compound (4)

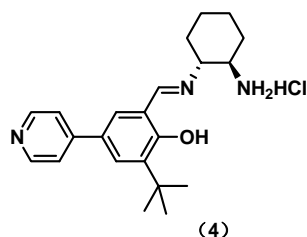

A solution of 3-tert-butyl-2-hydroxy-5-(pyridin-4-yl)benzaldehyde (2.55 g, 10 mmol) in MeOH (25 ml) was added dropwise to (1*R*,2*R*)-cyclohexane-1,2-diamine hydrochloride (1.8 g, 10.2 mmol) in MeOH (10 ml) at 60 °C. The reaction mixture was stirred at 60 °C for 4 h. Then, the light yellow precipitate of compound **4** was produced during the reaction and the precipitate were collected by filtration and washed with hot methanol (50°C), which in that case gave quantitative pure compound of **4**.

### 2.5 Preparation of compound (5)

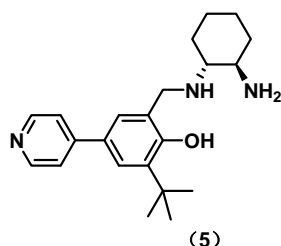

A slurry of compound **4** (774 mg, 2 mmol) in methanol (10 mL) and 3 equiv of

NaBH<sub>4</sub> (227 mg, 6 mmol) were added portion-wise with stirring. The reaction mixture was stirred 6 h at RT, during which time its color turned light yellow. The solvent was evaporated under vacuum and the reaction mixture was poured into 50 mL of water. Then the desired product was extracted with ethyl acetate (3×50 ml). The combined organic layers were washed with brine till the pH reached 7 and then dried over Na<sub>2</sub>SO<sub>4</sub>. After removal of the solvent, the pure product compound **5** was obtained in a 96% yield.

## 2.6 Preparation of compound (7)

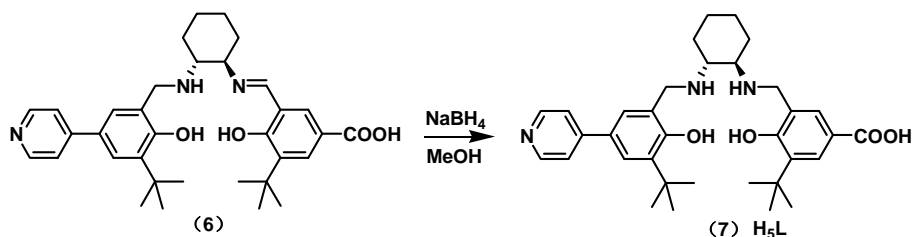

A solution of compound **5** (0.706 g, 2 mmol) in THF (5 ml) was added dropwise to 3-tert-butyl-5-formyl-4-hydroxybenzoic acid **3** (0.457 g, 2.06 mmol) in THF (5 ml) at 60 °C. The reaction mixture was stirred at 60 °C for 5 h and the solvent was removed in vacuo and the crude product of **6** was obtained as yellow power, which was proceed directly to the next step of the reduction reaction. The crude product of **6** in methanol (25 mL) and 3 equiv of NaBH<sub>4</sub> (227 mg, 6 mmol) were added portion-wise with stirring. The reaction mixture was stirred 6 h at RT. The solvent was evaporated under vacuum and the reaction mixture was poured into 50 mL of water. Then the desired product was extracted with ethyl acetate (3×50 ml). The combined organic layers were washed with brine till the pH reached 7 and then dried over Na<sub>2</sub>SO<sub>4</sub>. After removal of the solvent and washed with Et<sub>2</sub>O (2×5 ml). the pure product compound **7** was obtained in a total yield of 76% (849 mg).

## 2.7 Synthesis of [TiL(OBu)<sub>2</sub>]

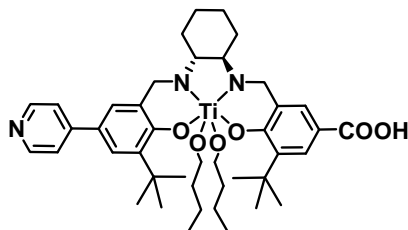

A solution of tetrabutyl titanate (340 mg, 1 mmol) in anhydrous THF (10 mL) was added dropwise to H<sub>3</sub>L (559 mg, 1 mmol) in anhydrous THF (30 mL). The reaction mixture immediately change into bright yellow and stirred at room temperature for 8 h, after which the solvent was evaporated under vacuum, The yellow powder of [TiL(OBu)<sub>2</sub>] was collected, washed with MeOH and Et<sub>2</sub>O, respectively, then dried under reduced pressure (637 mg, 85%). MS (ESI) for [M+H]<sup>+</sup>: calcd 749.3, found 750.0.

## 2.8 Synthesis of **1**.

A mixture of CdBr<sub>2</sub>·4H<sub>2</sub>O (2.75 mg, 0.008 mmol), [TiL(OBu)<sub>2</sub>] (2.99 mg, 0.004 mmol), DMF (1 mL) and MeOH (0.3 ml) in a capped vial was heated at 100 °C for one day. Yellow block-like crystals of **1** were filtered, washed with DMF and MeOH, respectively, and dried at room temperature. Yield: 5.26 mg (76.0%). Elemental Analysis an IR data of Cd<sub>3</sub>(μ<sub>3</sub>-OH)Br[(TiLOMe)<sub>2</sub>O]<sub>2</sub>·3DMF·H<sub>2</sub>O: Anal (%). Calcd for C<sub>158</sub>H<sub>172</sub>BrCd<sub>3</sub>N<sub>18</sub>O<sub>31</sub>Ti<sub>4</sub>: C, 55.36; H, 5.06; N, 7.36. Found: C, 54.91; H, 5.83; N, 7.30. FTIR (KBr pellet): 3434 (m), 3081 (w), 2938 (s), 2861 (m), 2804 (w), 1663 (m), 1598 (s), 1537 (m), 1524 (m), 1465 (s), 1444 (s), 1384 (s), 1320 (m), 1275 (s), 1226 (m), 1163 (w), 1074 (m), 1015 (w), 974 (w), 947 (w), 902(w), 827 (m), 805 (w), 794 (w), 703 (s), 606(w), 570 (m), 551 (w), 485 (w) cm<sup>-1</sup>.

## 2.9 Synthesis of **2**.

A mixture of Zn(OAc)<sub>2</sub>·2H<sub>2</sub>O (1.76 mg, 0.008 mmol), [TiL(OBu)<sub>2</sub>] (2.99 mg, 0.004 mmol), DMF (1 mL) and EtOH (0.5 ml) in a capped vial was heated at 100 °C for one day. Yellow block-like crystals of **2** were filtered, washed with DMF and

MeOH, respectively, and dried at room temperature. Yield: 4.31 mg (66%). Elemental Analysis and IR data of  $\text{Zn}_3(\mu_3\text{-OH})(\text{OH})[(\text{TiLOEt})_2\text{O}]_2 \cdot 3\text{DMF}$ : Anal (%). Calcd for  $\text{C}_{162}\text{H}_{180}\text{N}_{18}\text{O}_{30}\text{Ti}_4\text{Zn}_3$ : C, 59.93; H, 5.59; N, 7.76. Found: C, 59.46; H, 6.31; N, 7.71. FTIR (KBr pellet): 3426 (m), 3090 (w), 2936 (s), 2857 (m), 2808 (w), 1670 (m), 1597 (s), 1541 (m), 1466 (s), 1443 (s), 1385 (s), 1322 (m), 1273 (s), 1224 (m), 1163 (w), 1121 (w), 1075 (m), 1026 (w), 1002 (w), 974 (w), 946 (w), 919 (w), 902 (w), 827 (m), 792 (w), 703 (s), 680 (s), 647 (w), 606 (w), 569 (m), 551 (w), 488 (w)  $\text{cm}^{-1}$ .

### 3. Experimental procedure and determination of enantiomeric purity for sulfoxides

#### Typical catalytic process

The catalyst (*R,R*)-**1** (9.8 mg, 2.8  $\mu\text{mol}$ , 0.0112 equiv) and sulfide (0.25 mmol) were combined in acetone (1 mL) and stirred for 20 min at 25 °C, followed by adding an 1.15 eq oxidant (30 % aqueous hydroperoxide) in one portion. Stirring was continued at 0°C for 16 h. The ee of resulted sulfoxides was determined by HPLC using Chiralcel OD-H and Chiralcel OJ-H columns, and conversion was determined by  $^1\text{H}$  NMR.

#### 4. Table S1. Crystal data and structure refinement for 1.

| Identification code                              | 1                                                                                                                               | 2                                                                                                                              |
|--------------------------------------------------|---------------------------------------------------------------------------------------------------------------------------------|--------------------------------------------------------------------------------------------------------------------------------|
| Empirical formula                                | C <sub>158</sub> H <sub>172</sub> BrCd <sub>3</sub> N <sub>18</sub> O <sub>31</sub> Ti <sub>4</sub>                             | C <sub>162</sub> H <sub>180</sub> N <sub>18</sub> O <sub>30</sub> Ti <sub>4</sub> Zn <sub>3</sub>                              |
| Formula weight                                   | 3427.85                                                                                                                         | 3246.95                                                                                                                        |
| Temperature (K)                                  | 100(2) K                                                                                                                        | 100(2) K                                                                                                                       |
| Wavelength (Å)                                   | 1.54178                                                                                                                         | 1.54178                                                                                                                        |
| Crystal system                                   | orthorhombic                                                                                                                    | orthorhombic                                                                                                                   |
| Space group                                      | P 2 <sub>1</sub> 2 <sub>1</sub> 2                                                                                               | P 2 <sub>1</sub> 2 <sub>1</sub> 2                                                                                              |
| Unit cell dimensions                             | $a = 34.4419(13) \text{ Å}$<br>$b = 16.7622(8) \text{ Å}$<br>$c = 18.4473(8) \text{ Å}$<br>$\alpha = \beta = \gamma = 90^\circ$ | $a = 34.0597(5) \text{ Å}$<br>$b = 16.9014(2) \text{ Å}$<br>$c = 18.3315(3) \text{ Å}$<br>$\alpha = \beta = \gamma = 90^\circ$ |
| Volume (Å <sup>3</sup> ), Z                      | 10650.0(8), 2                                                                                                                   | 10552.6(3), 2                                                                                                                  |
| Density (calculated) (mg/m <sup>3</sup> )        | 1.069                                                                                                                           | 1.022                                                                                                                          |
| Absorption coefficient (mm <sup>-1</sup> )       | 4.258                                                                                                                           | 2.073                                                                                                                          |
| F(000)                                           | 3522                                                                                                                            | 3392                                                                                                                           |
| $\theta$ range for data collection (°)           | 3.51 to 55                                                                                                                      | 2.92 to 55.00                                                                                                                  |
| Limiting indices                                 | $-36 \leq h \leq 32$ , $-13 \leq k \leq 17$ , $-16 \leq l \leq 19$                                                              | $-35 \leq h \leq 35$ , $-17 \leq k \leq 13$ , $-17 \leq l \leq 19$                                                             |
| Reflections collected                            | 26815                                                                                                                           | 25138                                                                                                                          |
| Independent reflections                          | 11722 [R(int) = 0.0894]                                                                                                         | 12261 [R(int) = 0.0377]                                                                                                        |
| Completeness to theta                            | 55.00/96.1 %                                                                                                                    | 55.00/96.9 %                                                                                                                   |
| Refinement method                                | Full-matrix least-squares on F <sup>2</sup>                                                                                     | Full-matrix least-squares on F <sup>2</sup>                                                                                    |
| Data / restraints / parameters                   | 11722 / 14 / 783                                                                                                                | 12261 / 102 / 821                                                                                                              |
| Goodness-of-fit on F <sup>2</sup>                | 1.074                                                                                                                           | 1.084                                                                                                                          |
| Final R indices [I > 2sigma(I)]                  | R <sub>1</sub> = 0.0794, wR <sub>2</sub> = 0.1873                                                                               | R <sub>1</sub> = 0.0984, wR <sub>2</sub> = 0.2573                                                                              |
| R indices (all data)                             | R <sub>1</sub> = 0.1197, wR <sub>2</sub> = 0.2054                                                                               | R <sub>1</sub> = 0.1145, wR <sub>2</sub> = 0.2757                                                                              |
| Absolute structure parameter                     | 0.005(12)                                                                                                                       | 0.031(13)                                                                                                                      |
| Largest diff. peak and hole (e.Å <sup>-3</sup> ) | 0.672 and -0.492                                                                                                                | 1.202 and -0.579                                                                                                               |



**5. Table S2. Selected Bond lengths and angles for 1.**

|                 |           |
|-----------------|-----------|
| Ti(1)-O(6)      | 1.832(8)  |
| Ti(1)-O(4)      | 1.859(7)  |
| Ti(1)-O(5)      | 1.864(8)  |
| Ti(1)-O(3)      | 1.921(8)  |
| Ti(1)-N(1)      | 2.200(9)  |
| Ti(1)-N(2)      | 2.284(10) |
| Ti(2)-O(6)      | 1.829(8)  |
| Ti(2)-O(12)     | 1.864(7)  |
| Ti(2)-O(11)     | 1.874(7)  |
| Ti(2)-O(10)     | 1.936(7)  |
| Ti(2)-N(4)      | 2.211(9)  |
| Ti(2)-N(5)      | 2.252(9)  |
| Cd(1)-O(7)      | 2.319(9)  |
| Cd(1)-O(7)#1    | 2.319(9)  |
| Cd(1)-N(6)#2    | 2.348(5)  |
| Cd(1)-N(6)#3    | 2.348(5)  |
| Cd(1)-O(9)      | 2.377(15) |
| Cd(1)-Br(1)     | 2.582(2)  |
| Cd(2)-O(9)      | 2.147(4)  |
| Cd(2)-N(3)#2    | 2.199(7)  |
| Cd(2)-O(8)      | 2.242(12) |
| Cd(2)-O(2)#4    | 2.298(10) |
| Cd(2)-O(1)#4    | 2.327(9)  |
| Cd(2)-O(7)      | 2.477(9)  |
| O(2)-Cd(2)#5    | 2.298(10) |
| O(9)-Cd(2)#1    | 2.147(4)  |
| N(3)-Cd(2)#6    | 2.199(7)  |
| N(6)-Cd(1)#6    | 2.348(5)  |
|                 |           |
| O(6)-Ti(1)-O(4) | 99.4(3)   |
| O(6)-Ti(1)-O(5) | 90.8(3)   |
| O(4)-Ti(1)-O(5) | 103.6(3)  |
| O(6)-Ti(1)-O(3) | 167.4(3)  |
| O(4)-Ti(1)-O(3) | 91.8(3)   |
| O(5)-Ti(1)-O(3) | 92.2(4)   |
| O(6)-Ti(1)-N(1) | 86.1(3)   |
| O(4)-Ti(1)-N(1) | 157.3(4)  |
| O(5)-Ti(1)-N(1) | 98.3(4)   |
| O(3)-Ti(1)-N(1) | 81.3(3)   |
| O(6)-Ti(1)-N(2) | 84.2(4)   |
| O(4)-Ti(1)-N(2) | 81.8(3)   |
| O(5)-Ti(1)-N(2) | 173.2(4)  |
| O(3)-Ti(1)-N(2) | 91.8(4)   |

|                     |            |
|---------------------|------------|
| N(1)-Ti(1)-N(2)     | 76.8(3)    |
| O(6)-Ti(2)-O(12)    | 90.2(3)    |
| O(6)-Ti(2)-O(11)    | 98.9(3)    |
| O(12)-Ti(2)-O(11)   | 103.9(4)   |
| O(6)-Ti(2)-O(10)    | 164.5(3)   |
| O(12)-Ti(2)-O(10)   | 92.2(3)    |
| O(11)-Ti(2)-O(10)   | 95.4(3)    |
| O(6)-Ti(2)-N(4)     | 83.6(3)    |
| O(12)-Ti(2)-N(4)    | 97.2(4)    |
| O(11)-Ti(2)-N(4)    | 158.7(3)   |
| O(10)-Ti(2)-N(4)    | 80.9(3)    |
| O(6)-Ti(2)-N(5)     | 86.3(3)    |
| O(12)-Ti(2)-N(5)    | 173.4(4)   |
| O(11)-Ti(2)-N(5)    | 82.2(3)    |
| O(10)-Ti(2)-N(5)    | 89.8(3)    |
| N(4)-Ti(2)-N(5)     | 76.8(3)    |
| O(7)-Cd(1)-O(7)#1   | 155.1(4)   |
| O(7)-Cd(1)-N(6)#2   | 86.8(3)    |
| O(7)#1-Cd(1)-N(6)#2 | 89.6(3)    |
| O(7)-Cd(1)-N(6)#3   | 89.6(3)    |
| O(7)#1-Cd(1)-N(6)#3 | 86.8(3)    |
| N(6)#2-Cd(1)-N(6)#3 | 163.3(4)   |
| O(7)-Cd(1)-O(9)     | 77.5(2)    |
| O(7)#1-Cd(1)-O(9)   | 77.5(2)    |
| N(6)#2-Cd(1)-O(9)   | 81.7(2)    |
| N(6)#3-Cd(1)-O(9)   | 81.7(2)    |
| O(7)-Cd(1)-Br(1)    | 102.5(2)   |
| O(7)#1-Cd(1)-Br(1)  | 102.5(2)   |
| N(6)#2-Cd(1)-Br(1)  | 98.3(2)    |
| N(6)#3-Cd(1)-Br(1)  | 98.3(2)    |
| O(9)-Cd(1)-Br(1)    | 180.000(1) |
| O(9)-Cd(2)-N(3)#2   | 108.3(3)   |
| O(9)-Cd(2)-O(8)     | 130.3(4)   |
| N(3)#2-Cd(2)-O(8)   | 100.1(4)   |
| O(9)-Cd(2)-O(2)#4   | 113.9(5)   |
| N(3)#2-Cd(2)-O(2)#4 | 94.5(4)    |
| O(8)-Cd(2)-O(2)#4   | 103.2(3)   |
| O(9)-Cd(2)-O(1)#4   | 83.8(4)    |
| N(3)#2-Cd(2)-O(1)#4 | 149.2(4)   |
| O(8)-Cd(2)-O(1)#4   | 92.1(5)    |
| O(2)#4-Cd(2)-O(1)#4 | 55.0(3)    |
| O(9)-Cd(2)-O(7)     | 78.6(4)    |
| N(3)#2-Cd(2)-O(7)   | 101.7(4)   |
| O(8)-Cd(2)-O(7)     | 55.9(3)    |

|                    |          |
|--------------------|----------|
| O(2)#4-Cd(2)-O(7)  | 155.3(3) |
| O(1)#4-Cd(2)-O(7)  | 108.5(4) |
| Ti(2)-O(6)-Ti(1)   | 159.5(4) |
| Cd(1)-O(7)-Cd(2)   | 97.6(3)  |
| C(35)-O(8)-Cd(2)   | 95.5(9)  |
| Cd(2)-O(9)-Cd(2)#1 | 148.5(8) |
| Cd(2)-O(9)-Cd(1)   | 105.8(4) |
| Cd(2)#1-O(9)-Cd(1) | 105.8(4) |

---

Symmetry transformations used to generate equivalent atoms:

#1 -x+2,-y+1,z      #2 x+1/2,-y+3/2,-z+1  
 #3 -x+3/2,y-1/2,-z+1      #4 x,y,z+1      #5 x,y,z-1  
 #6 x-1/2,-y+3/2,-z+1

**Table S3. Selected Bond lengths and angles for 2.**

|              |           |
|--------------|-----------|
| Zn(1)-N(6)#1 | 2.021(4)  |
| Zn(1)-O(8)#2 | 2.032(10) |
| Zn(1)-O(3)   | 2.042(9)  |
| Zn(1)-O(2)   | 2.093(13) |
| Zn(1)-O(7)#2 | 2.323(14) |
| Zn(2)-O(3)   | 1.929(19) |
| Zn(2)-N(3)#4 | 2.048(8)  |
| Zn(2)-O(1)   | 2.050(12) |
| Zn(2)-O(1)#3 | 2.140(14) |
| Zn(2)-O(13)  | 2.386(11) |
| Ti(1)-O(12)  | 1.836(5)  |
| Ti(1)-O(5)   | 1.845(6)  |
| Ti(1)-O(6)   | 1.857(8)  |
| Ti(1)-O(4)   | 1.938(7)  |
| Ti(1)-N(1)   | 2.217(8)  |
| Ti(1)-N(2)   | 2.254(9)  |
| Ti(2)-O(12)  | 1.829(5)  |
| Ti(2)-O(11)  | 1.868(5)  |

|                      |           |
|----------------------|-----------|
| Ti(2)-O(10)          | 1.874(5)  |
| Ti(2)-O(9)           | 1.923(5)  |
| Ti(2)-N(4)           | 2.203(7)  |
| Ti(2)-N(5)           | 2.275(6)  |
| O(1)-Zn(2)#3         | 2.140(14) |
| O(3)-Zn(2)#3         | 1.929(19) |
| O(3)-Zn(1)#3         | 2.042(9)  |
| O(7)-Zn(1)#5         | 2.323(14) |
| O(8)-Zn(1)#5         | 2.032(10) |
| O(13)-Zn(2)#3        | 2.386(11) |
| N(6)-Zn(1)#7         | 2.021(4)  |
|                      |           |
| N(6)#1-Zn(1)-O(8)#2  | 142.5(5)  |
| N(6)#1-Zn(1)-O(3)    | 108.4(2)  |
| O(8)#2-Zn(1)-O(3)    | 93.7(4)   |
| N(6)#1-Zn(1)-O(2)    | 99.7(3)   |
| O(8)#2-Zn(1)-O(2)    | 95.2(5)   |
| O(3)-Zn(1)-O(2)      | 118.9(6)  |
| N(6)#1-Zn(1)-O(7)#2  | 89.3(5)   |
| O(8)#2-Zn(1)-O(7)#2  | 53.8(5)   |
| O(3)-Zn(1)-O(7)#2    | 129.7(7)  |
| O(2)-Zn(1)-O(7)#2    | 103.0(6)  |
| O(3)-Zn(2)-N(3)#4    | 91.4(4)   |
| O(3)-Zn(2)-O(1)      | 86.2(4)   |
| N(3)#4-Zn(2)-O(1)    | 106.0(6)  |
| Zn(2)#3-Zn(2)-O(1)#3 | 71.7(6)   |
| O(3)-Zn(2)-O(1)#3    | 83.8(5)   |
| N(3)#4-Zn(2)-O(1)#3  | 98.8(5)   |
| O(1)-Zn(2)-O(1)#3    | 153.5(2)  |
| Zn(2)#3-Zn(2)-O(13)  | 78.44(8)  |

|                    |          |
|--------------------|----------|
| O(3)-Zn(2)-O(13)   | 154.1(2) |
| N(3)#4-Zn(2)-O(13) | 114.1(4) |
| O(1)-Zn(2)-O(13)   | 90.2(5)  |
| O(1)#3-Zn(2)-O(13) | 88.1(4)  |
| O(12)-Ti(1)-O(5)   | 99.0(3)  |
| O(12)-Ti(1)-O(6)   | 91.8(3)  |
| O(5)-Ti(1)-O(6)    | 103.6(3) |
| O(12)-Ti(1)-O(4)   | 165.5(3) |
| O(5)-Ti(1)-O(4)    | 93.4(3)  |
| O(6)-Ti(1)-O(4)    | 92.5(3)  |
| O(12)-Ti(1)-N(1)   | 84.0(3)  |
| O(5)-Ti(1)-N(1)    | 158.2(4) |
| O(6)-Ti(1)-N(1)    | 97.9(3)  |
| O(4)-Ti(1)-N(1)    | 81.7(3)  |
| O(12)-Ti(1)-N(2)   | 84.9(3)  |
| O(5)-Ti(1)-N(2)    | 83.7(3)  |
| O(6)-Ti(1)-N(2)    | 172.4(3) |
| O(4)-Ti(1)-N(2)    | 89.1(3)  |
| N(1)-Ti(1)-N(2)    | 75.0(3)  |
| O(12)-Ti(2)-O(11)  | 90.9(2)  |
| O(12)-Ti(2)-O(10)  | 99.1(2)  |
| O(11)-Ti(2)-O(10)  | 104.1(3) |
| O(12)-Ti(2)-O(9)   | 165.6(3) |
| O(11)-Ti(2)-O(9)   | 92.7(2)  |
| O(10)-Ti(2)-O(9)   | 93.5(2)  |
| O(12)-Ti(2)-N(4)   | 84.8(3)  |
| O(11)-Ti(2)-N(4)   | 97.8(3)  |
| O(10)-Ti(2)-N(4)   | 157.6(2) |
| O(9)-Ti(2)-N(4)    | 80.9(3)  |
| O(12)-Ti(2)-N(5)   | 84.5(2)  |

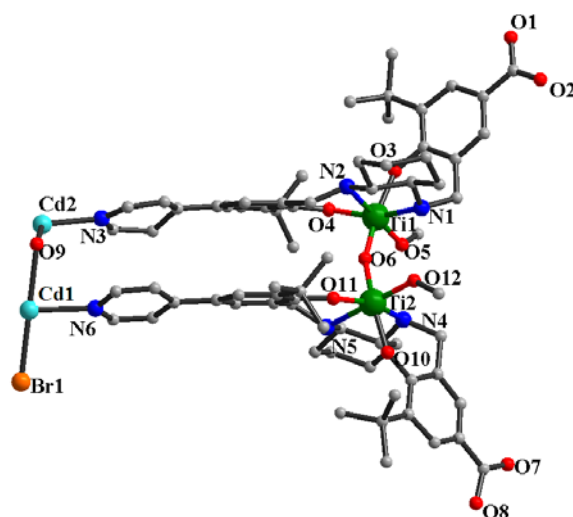

**6.2 Figure S2.** The coordination environment of Cd centers in **1**.

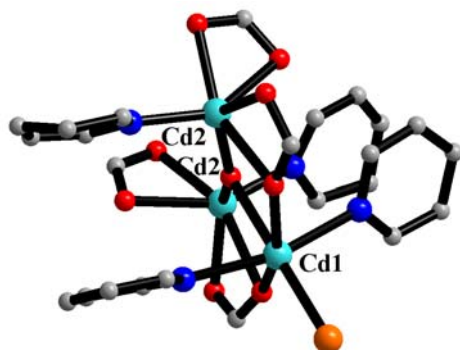

**6.3 Figure S3.** Coordination environment of dinuclear TiL unit in **2**. For clarity, hydrogen atoms were deleted.

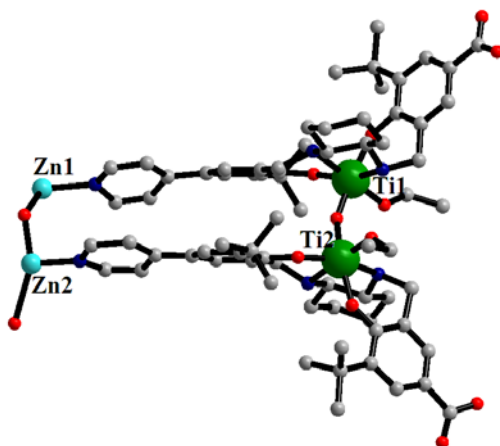

**6.4 Figure S4.** The coordination environment of Zn centers in **2**.

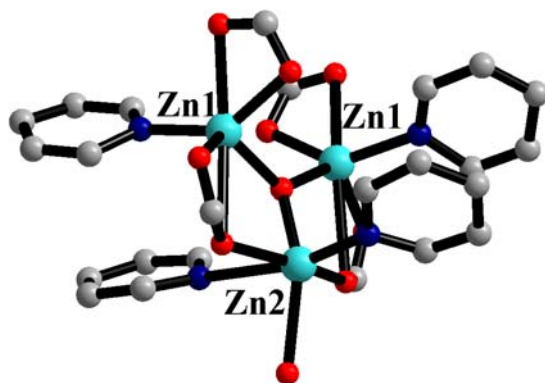

**6.5 Figure S5.** View of 3D structures of **1** and **2** along *b* direction.

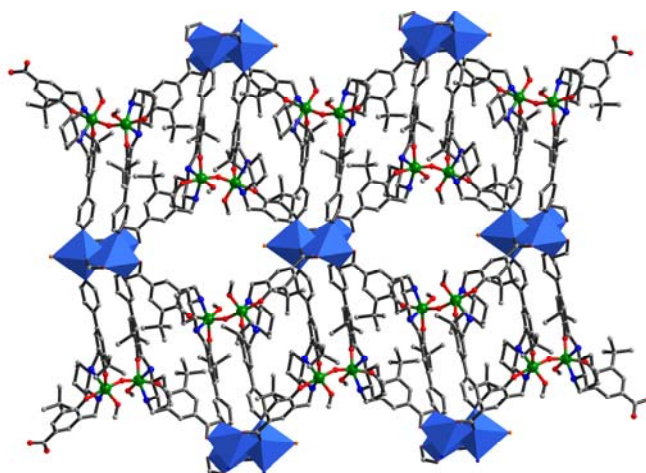

**6.6 Figure S6.** View of the distorted octahedral cavity in **1** and **2**.

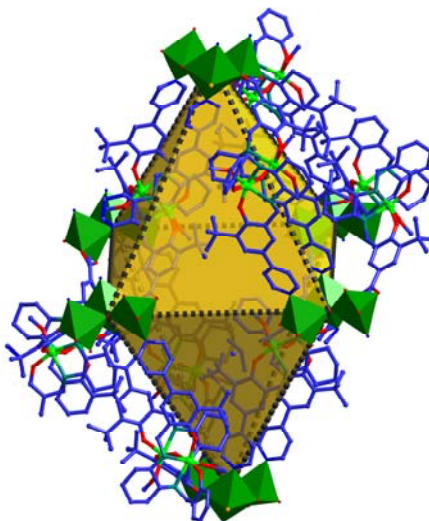

**7. Figure S7.** TGA curves of **1** and **2**.

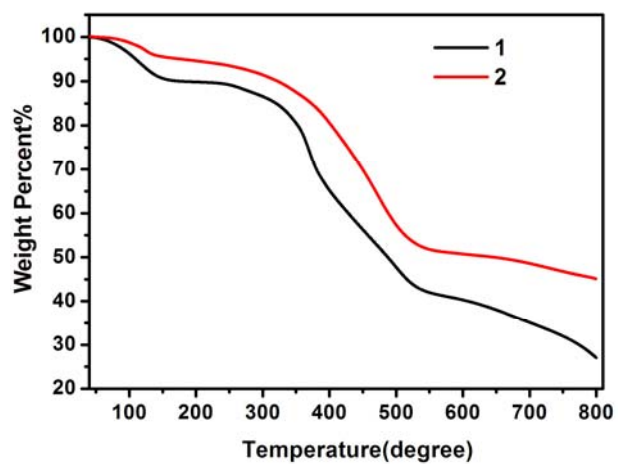



8. Figure S8. PXRD patterns of 1 and 2.

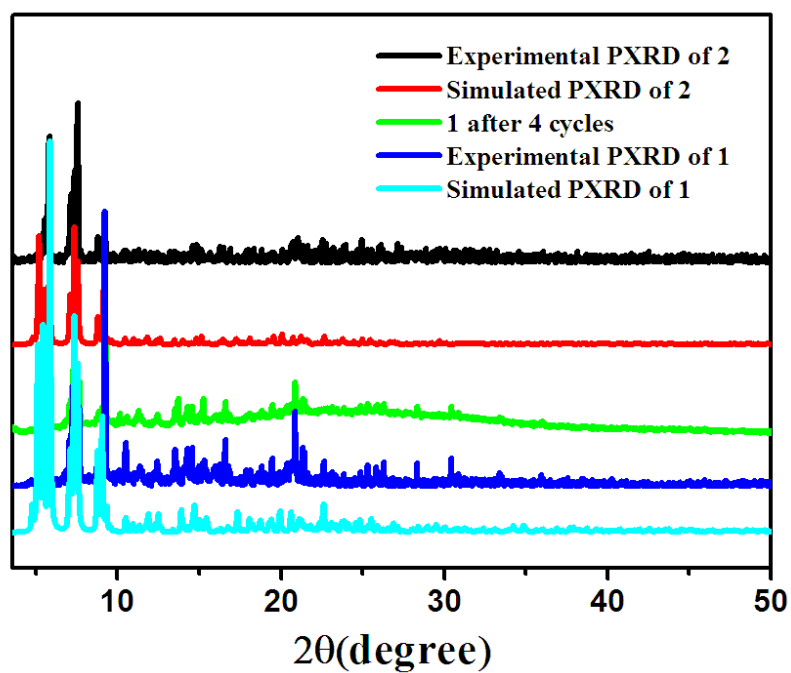

9. Figure S9. CD spectra of (R)/(S)-1 and (R)/(S)-2

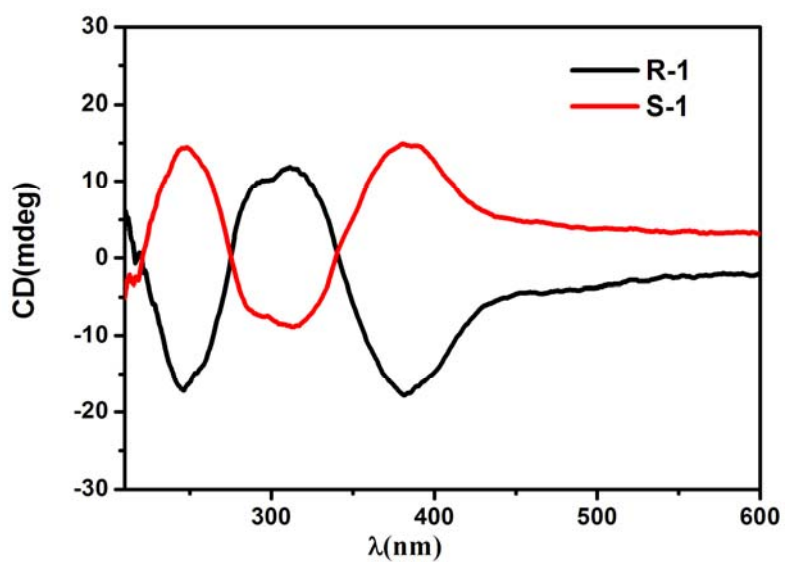

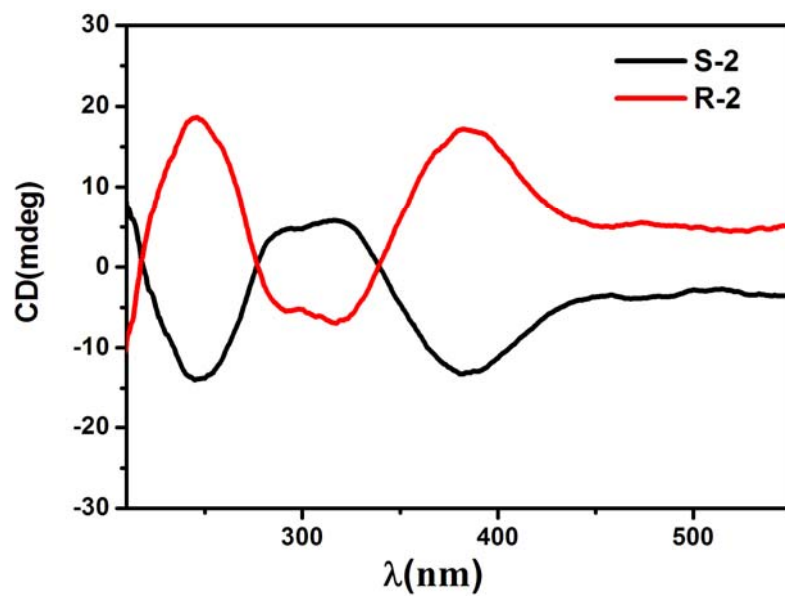

10. Figure S10. IR spectra of 1 and 2

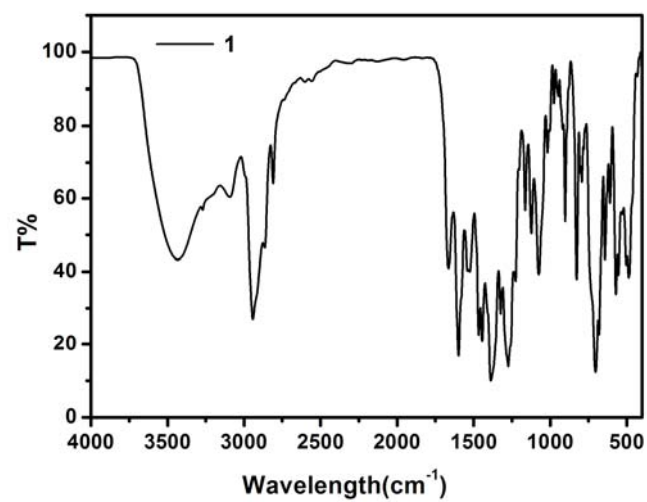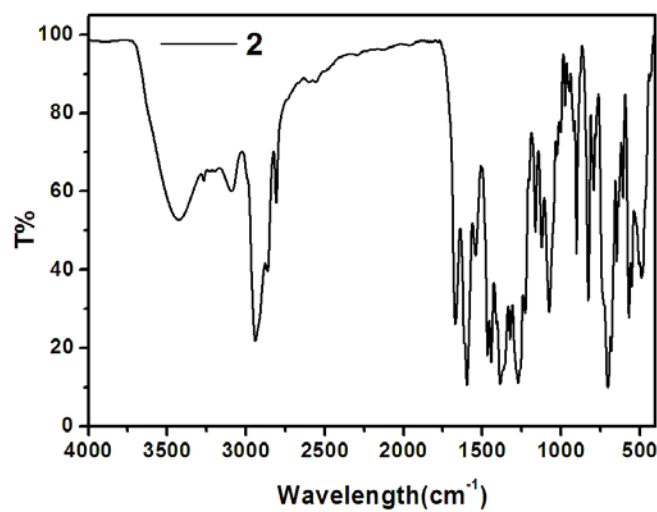

**11. Figure S11.  $^1\text{H}$  and  $^{13}\text{C}$  NMR for the  $\text{H}_5\text{L}$  and related predecessors.**

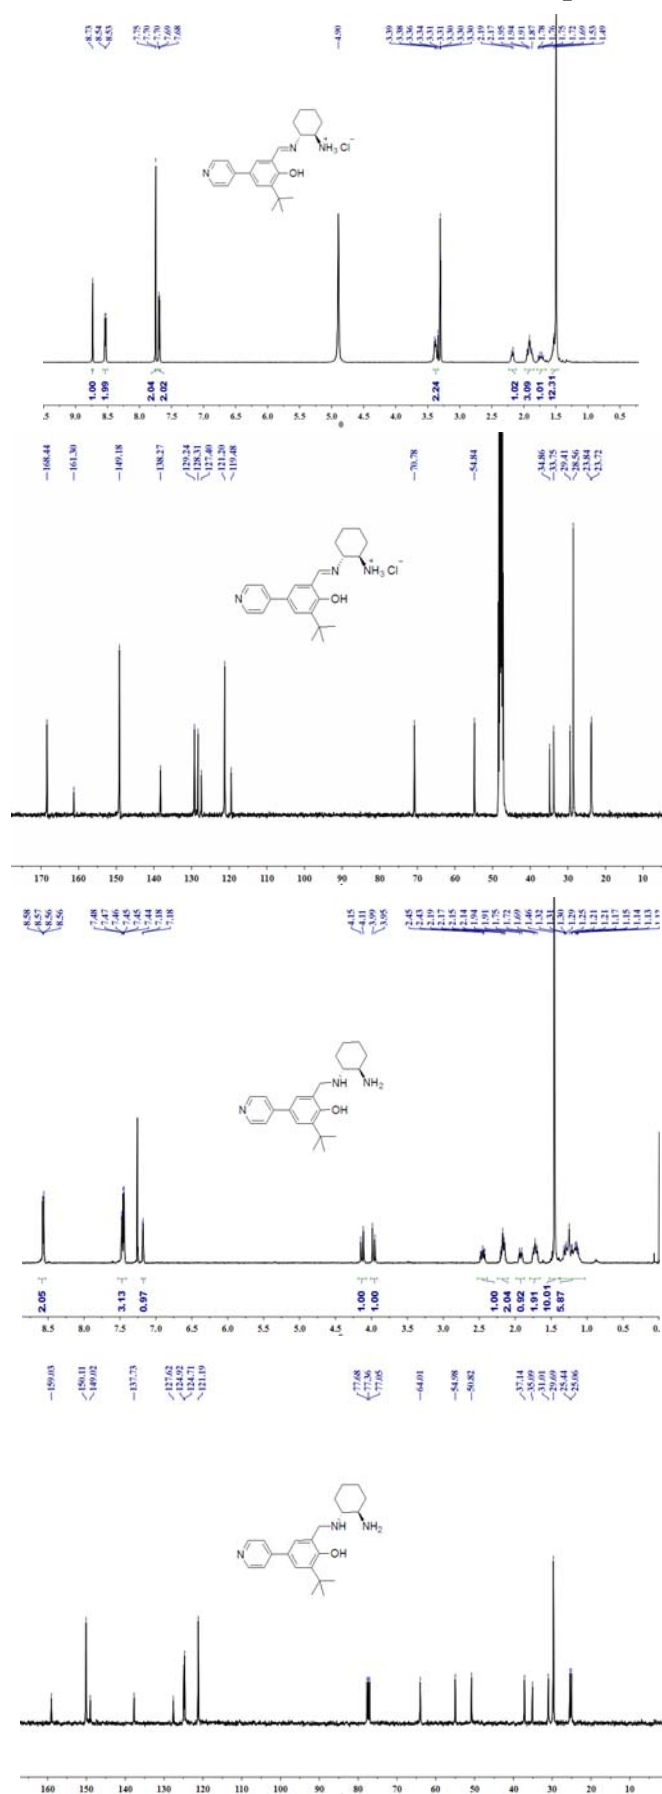

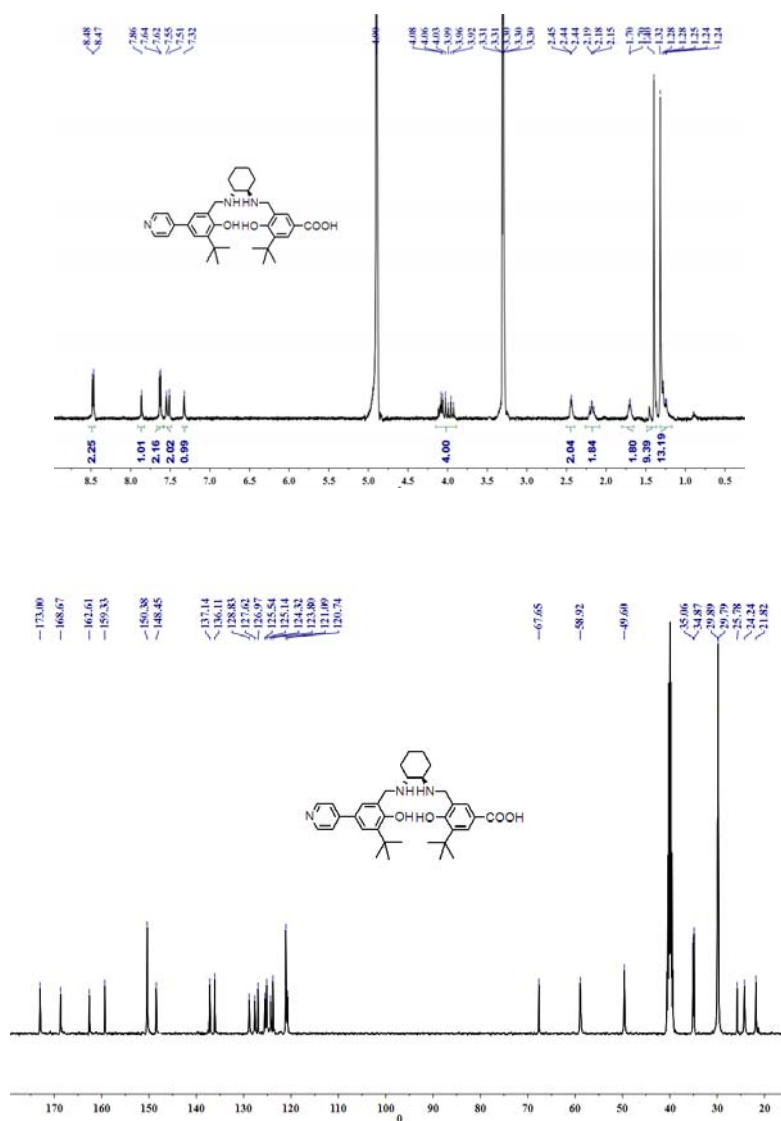

## 12. Figure S12. ESI-Mass of (R)-H<sub>5</sub>L.

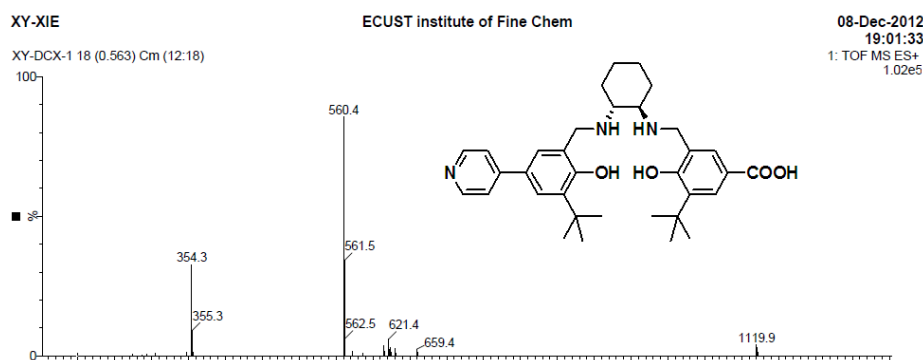

13. Figure S13. Nitrogen sorption isotherm (77 K) of activated **1**.

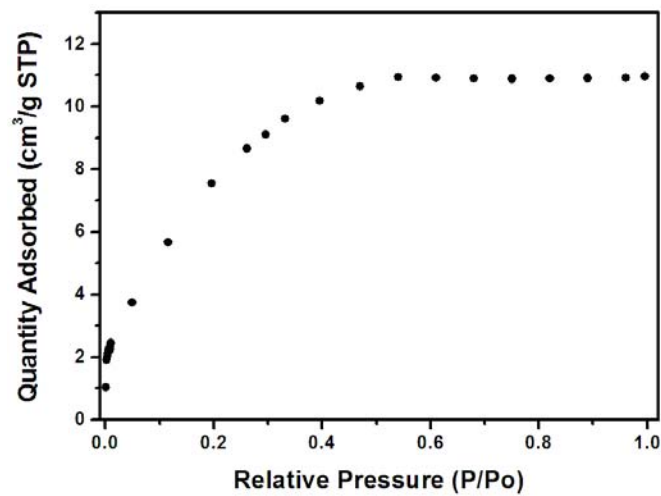

14. Figure S14. ICP-OES data obtained from the filtrate after asymmetric sulfoxidation of methyl *p*-toyl sulfide.

样品名:朱1    获取: 2013-3-27 16:17:52    类型: Unk  
方法: quan10(v250)    模式: CONC    校正因子: 0.061616  
用户: admin    定制ID1:    定制ID2:    定制ID3:  
备注:

|      |        |        |
|------|--------|--------|
| 元素   | Cd2144 | Ti3361 |
| 单位   | %      | %      |
| 平均值  | .0002  | .0006  |
| 标准偏差 | .0000  | .0000  |
| %RSD | 4.597  | .9533  |
| #1   | .0002  | .0006  |
| #2   | .0002  | .0006  |
| #3   | .0002  | .0006  |

15. Figure S15. The HNMR spectra of sulfoxides.

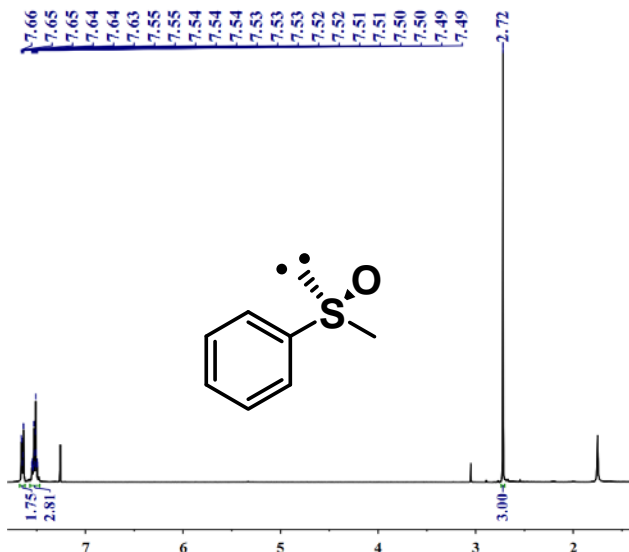

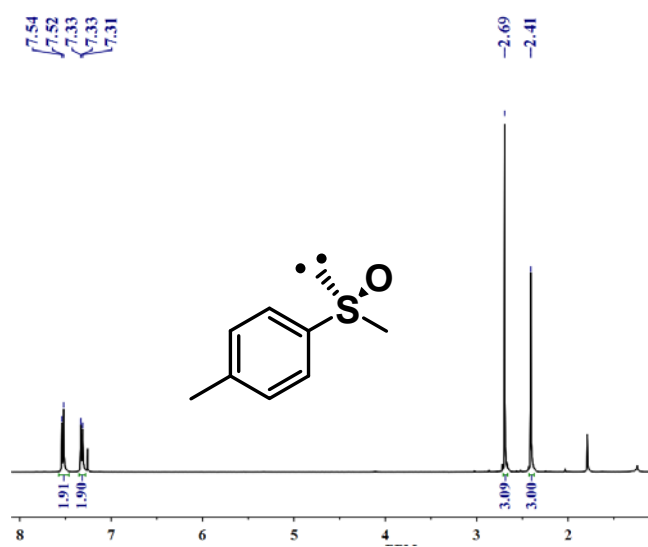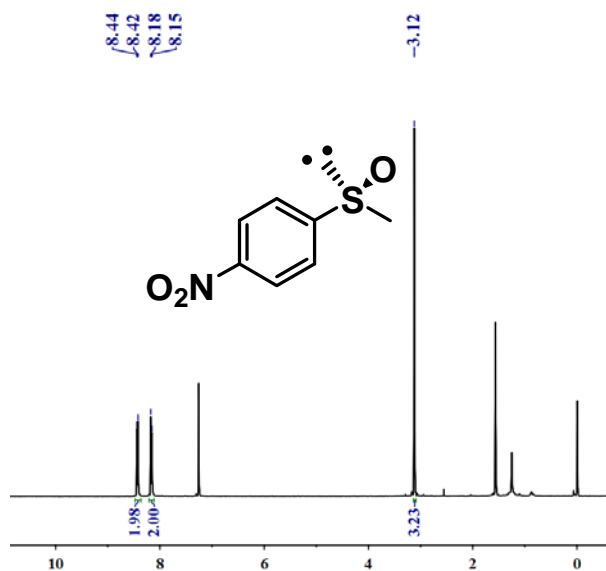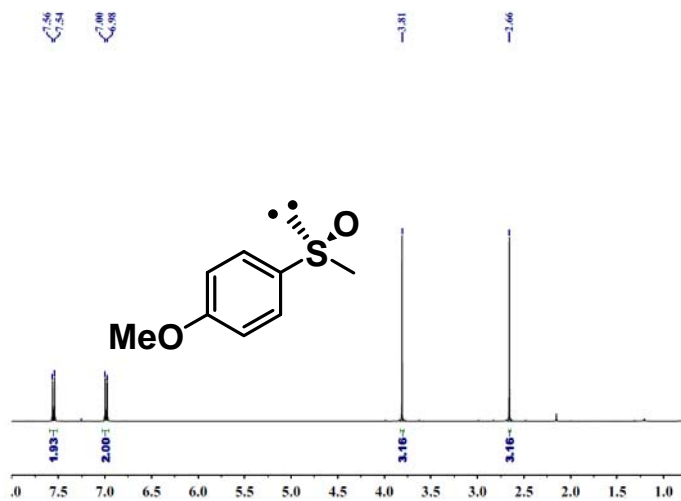

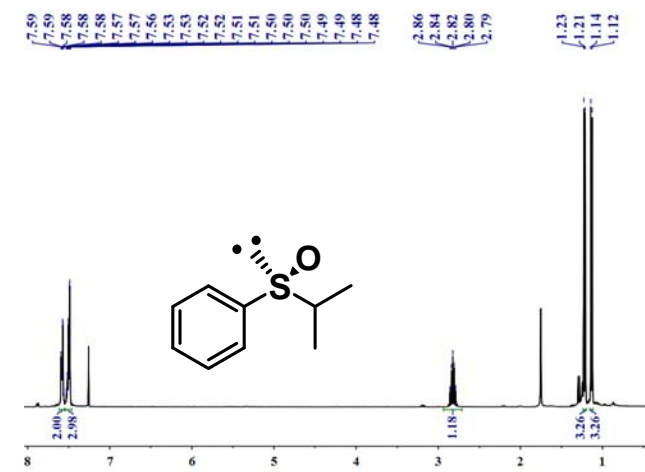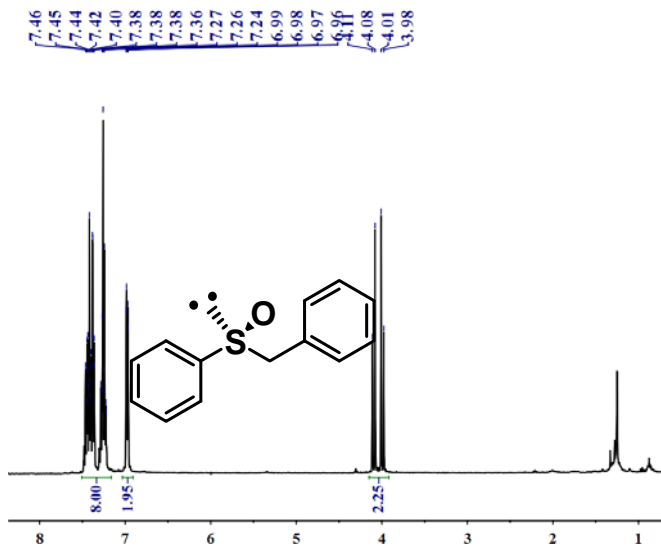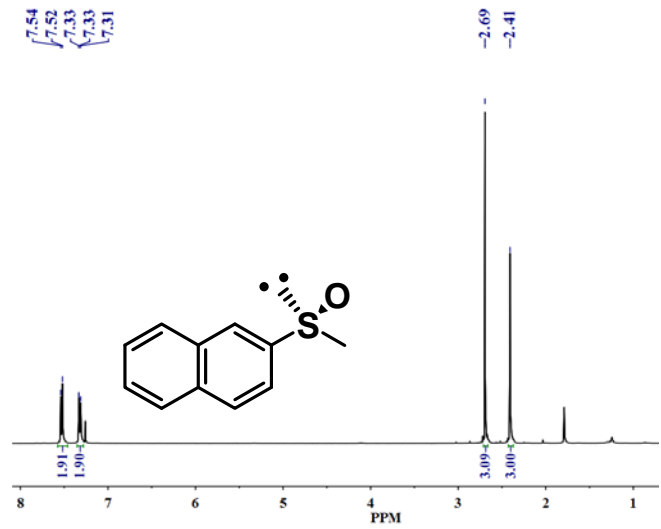

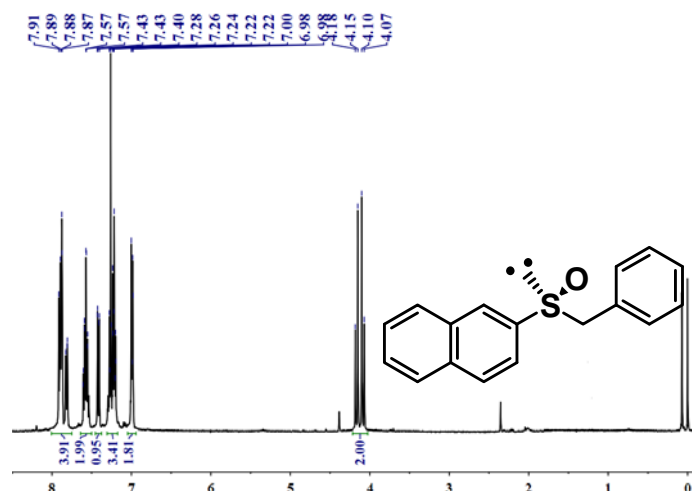

**16. Figure S16. The <sup>1</sup>H NMR analyses of conversion and selectivity in the oxidation reaction of sulfides.** The conversion were calculated according to the equation:  $\text{conversion} = ([\text{sulfone}] + [\text{sulfoxide}]) / ([\text{sulfide}] + [\text{sulfoxide}] + [\text{sulfone}]) \times 100\%$ ; The selectivity were calculated according to the equation:  $\text{selectivity} = ([\text{sulfoxide}] / ([\text{sulfoxide}] + [\text{sulfone}]) \times 100\%$ .

**Entry 1: Methyl phenyl sulfide (conversion=89%; selectivity = 84%)**

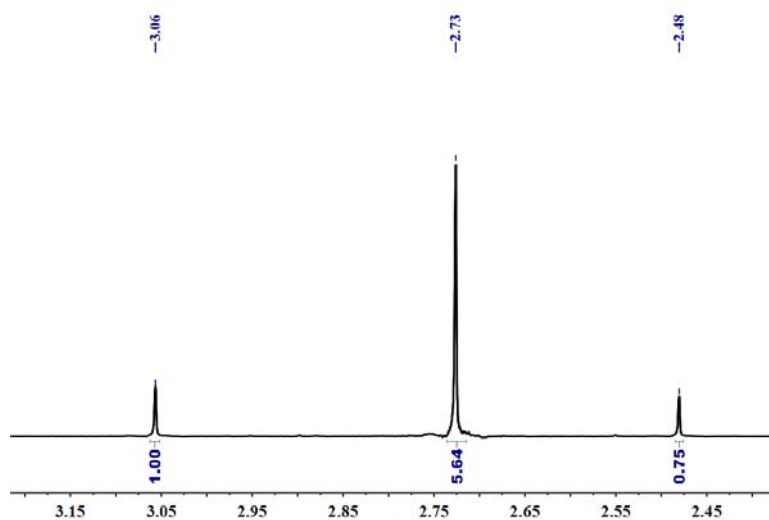



**Entry 2: Methyl phenyl sulfide (conversion=90%; selectivity = 85%)**

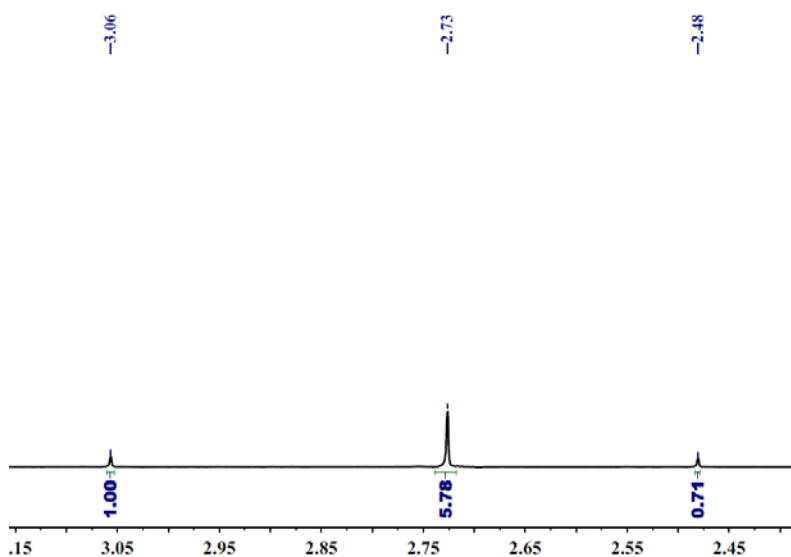

**Entry 3: Methyl phenyl sulfide (conversion=94%; selectivity = 64%)**

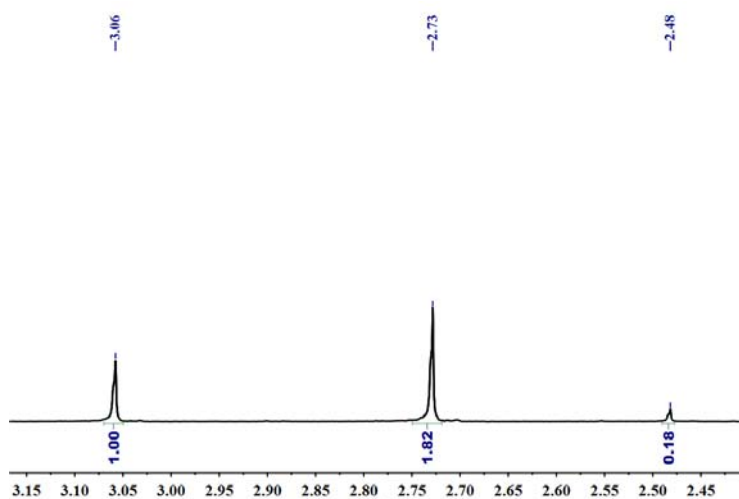

**Entry 4: Methyl 4-methylphenyl sulfide (conversion=90%; selectivity = 87%)**

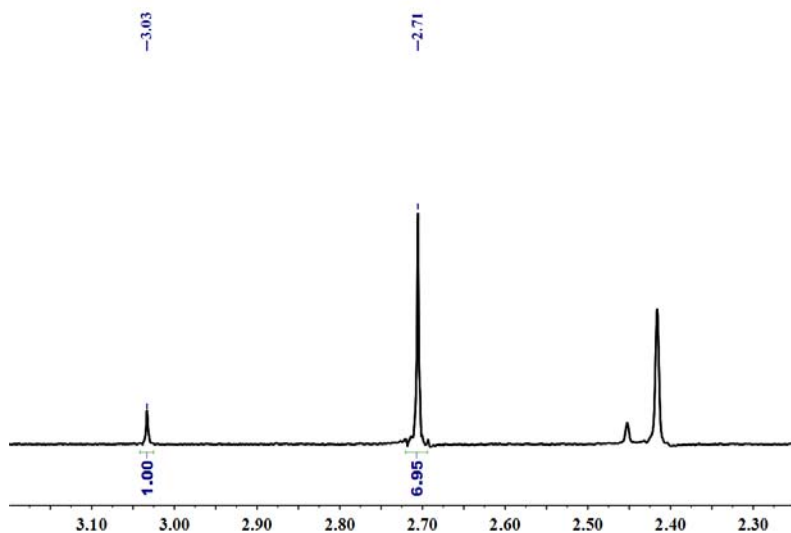

**Entry 5: Methyl 4-methylphenyl sulfide (conversion=89%; selectivity = 86%)**

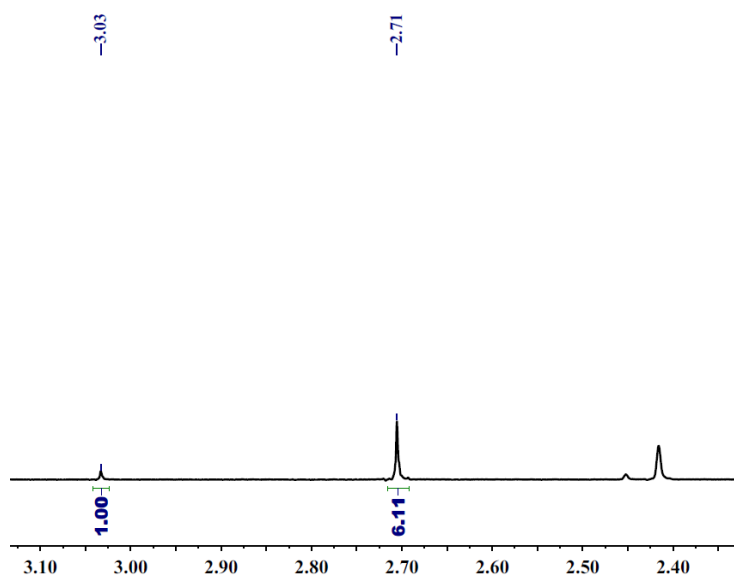

**Entry 6: Methyl 4-methylphenyl sulfide (conversion=93%; selectivity = 59%)**

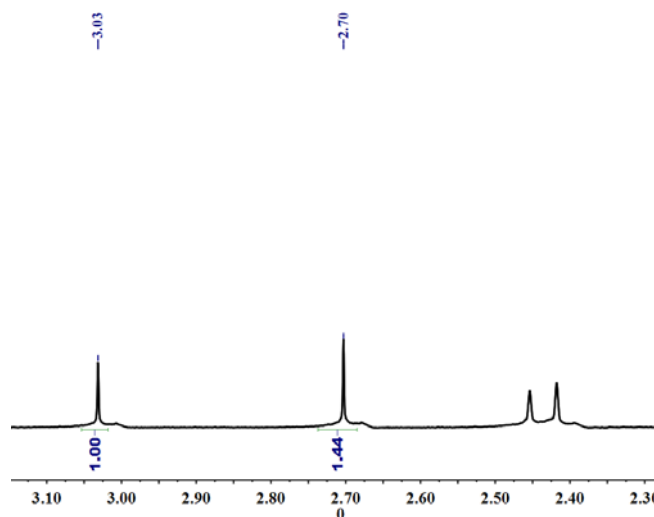

**Entry 7: Methyl 4-nitrophenyl sulfide (conversion=60%; selectivity = 77%)**

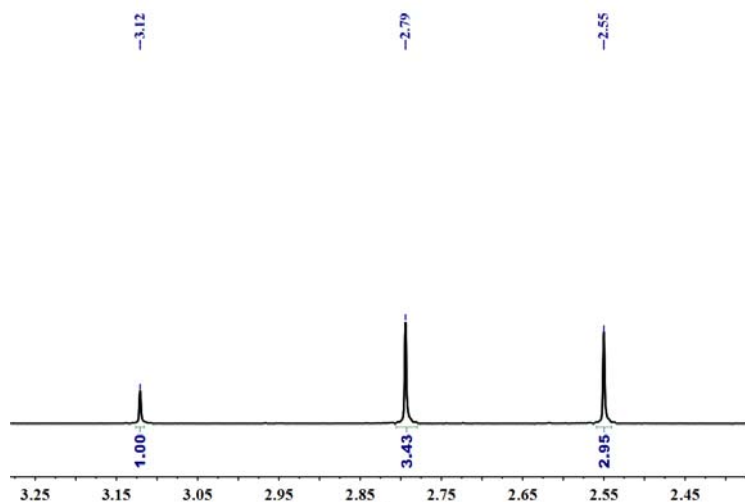

**Entry 8: Methyl 4-methoxyphenyl sulfide (conversion=88%; selectivity = 81%)**

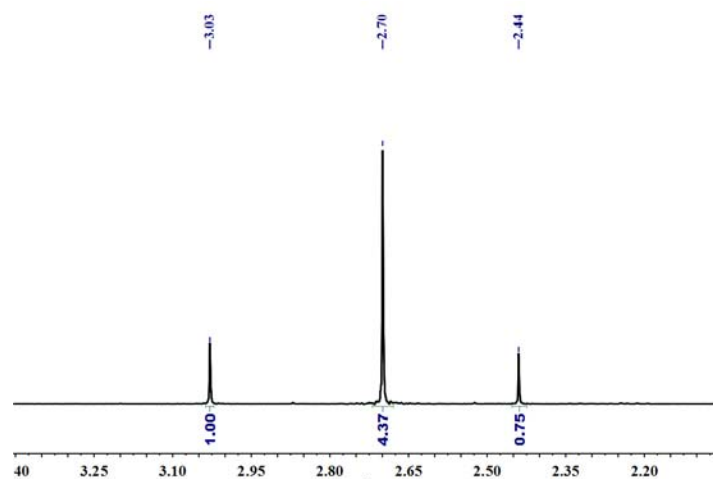

**Entry 9: Methyl 2-naphthyl sulfide (conversion=68%; selectivity = 88%)**

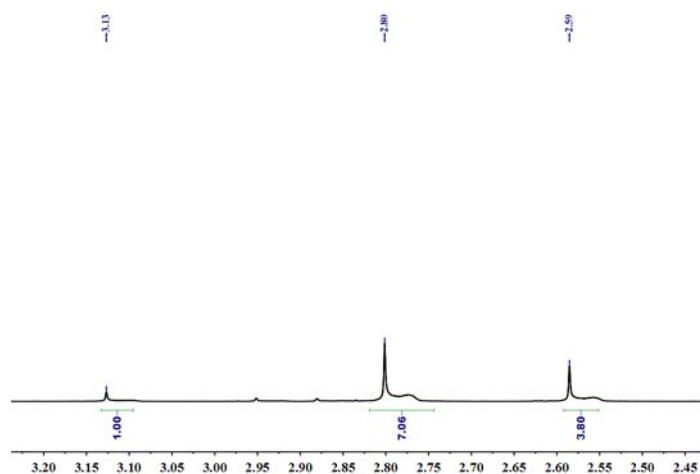

**Entry 10: Isopropyl phenyl sulfide (conversion=84%; selectivity = 99%)**

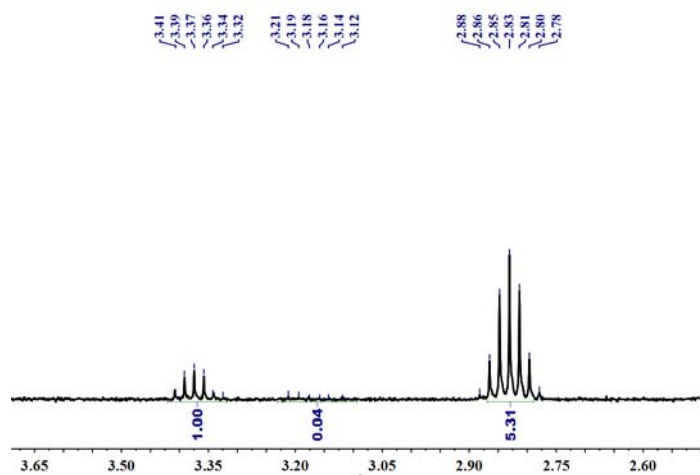

**Entry 11: Benzyl phenyl sulfide (conversion=54%; selectivity = 93%)**

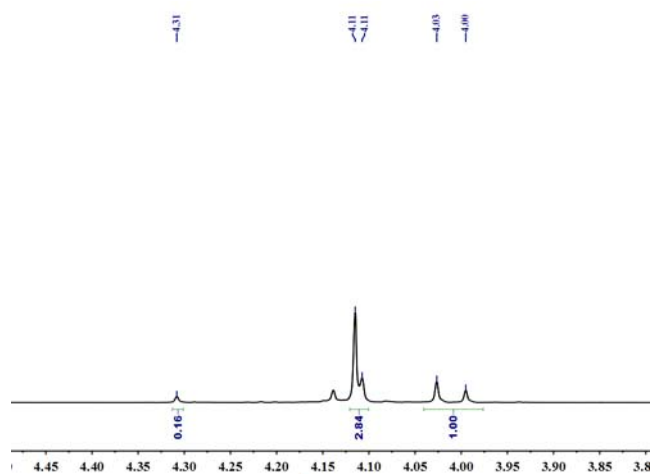

**Entry 12: Benzyl phenyl sulfide (conversion=87%; selectivity = 58%)**

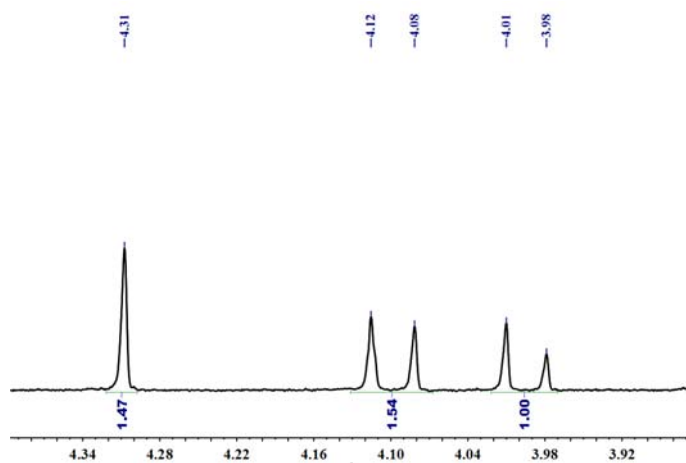

**Entry 13: Benzyl 2-naphthyl sulfide (conversion=5%; selectivity = 70%)**

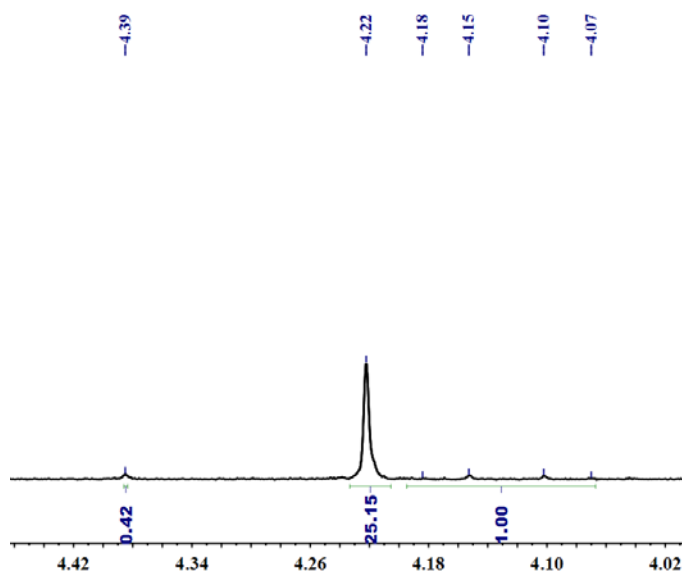

**Entry 14: Benzyl 2-naphthyl sulfide (conversion=88%; selectivity = 68%)**

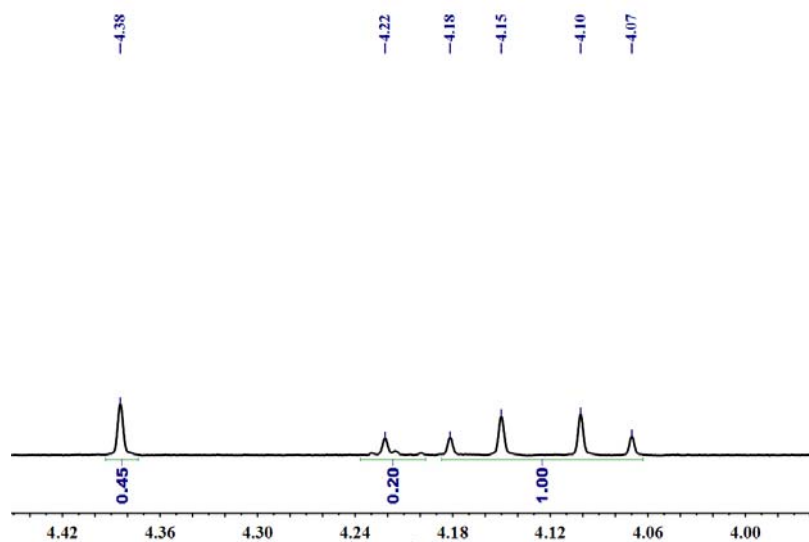

**17. Figure S17. The HPLC analyses of sulfoxides.**

**Methyl phenyl sulfoxide:** Chiralcel OD-H column: 90/10 hexane/*i*-PrOH; flow rate 1.0 mL/min;  $t_R$  = 13.3 min;  $t_R$  = 19.3 min.

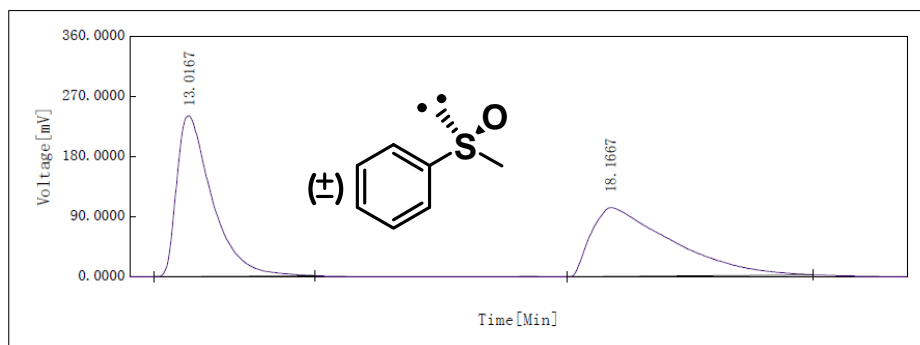

| Serial Number | Retention Time [min] | Area [mAbs*s] | Type | Area %  |
|---------------|----------------------|---------------|------|---------|
| 1             | 13.0167              | 7253.6035     | BB   | 50.8064 |
| 2             | 18.1667              | 7023.3479     | BB   | 49.1936 |
| The Total     |                      | 14276.9514    |      |         |

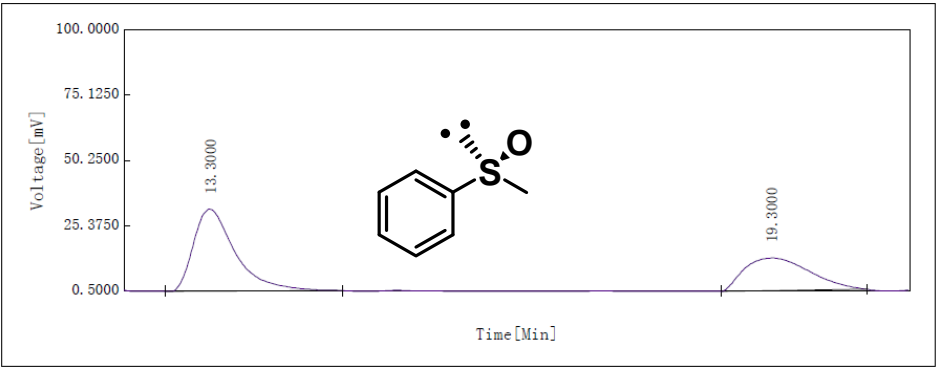

| Serial Number | Retention Time [min] | Area [mAbs*s] | Type | Area %  |
|---------------|----------------------|---------------|------|---------|
| 1             | 13.3000              | 998.3892      | BB   | 61.5530 |
| 2             | 19.3000              | 623.6112      | BB   | 38.4470 |
| The Total     |                      | 1622.0005     |      |         |

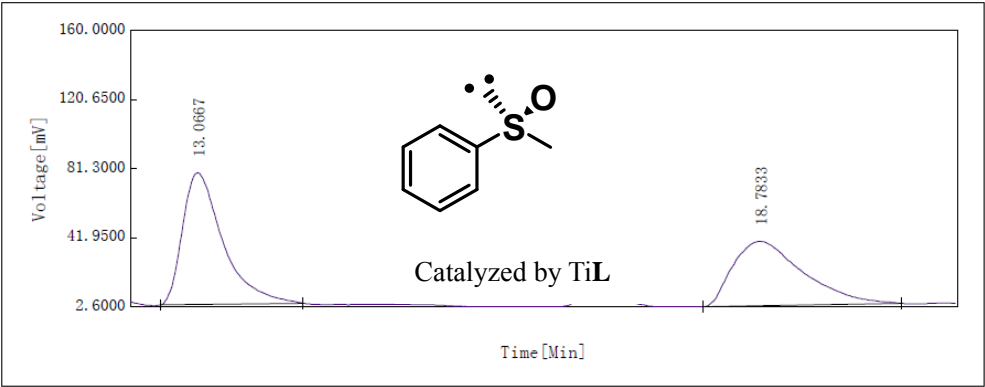

| Serial Number | Retention Time [min] | Area [mAbs*s] | Type | Area %  |
|---------------|----------------------|---------------|------|---------|
| 1             | 13.0667              | 2141.8732     | BB   | 53.9128 |
| 2             | 18.7833              | 1830.9723     | BB   | 46.0872 |
| The Total     |                      | 3972.8455     |      |         |

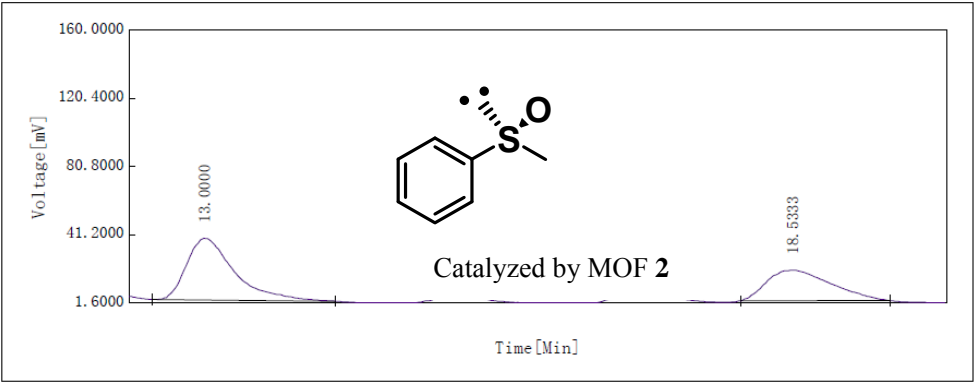

| Serial Number | Retention Time [min] | Area [mAbs*s] | Type | Area %  |
|---------------|----------------------|---------------|------|---------|
| 1             | 13.0000              | 1114.3944     | BB   | 59.8709 |
| 2             | 18.5333              | 746.9358      | BB   | 40.1291 |
| The Total     |                      | 1861.3302     |      |         |

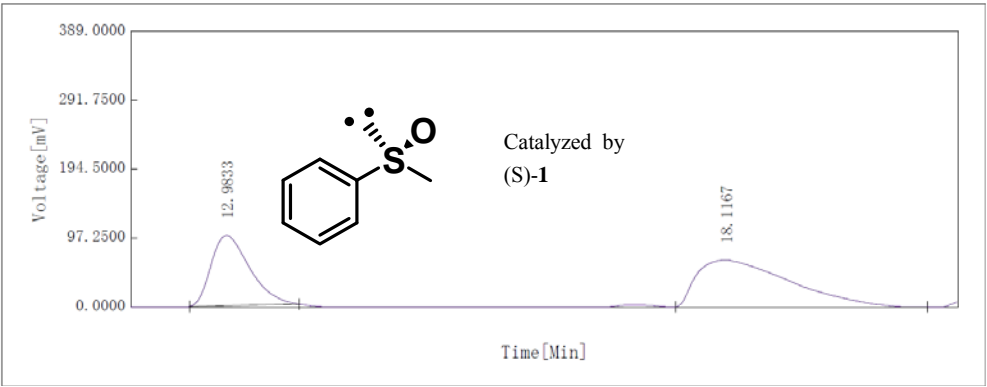

| Serial Number | Retention Time [min] | Area [mAbs*s] | Type | Area %  |
|---------------|----------------------|---------------|------|---------|
| 1             | 12.9833              | 2740.8914     | BB   | 37.8208 |
| 2             | 18.1167              | 4506.1579     | BB   | 62.1792 |
| The Total     |                      | 7247.0493     |      |         |

**Methyl p-toyl sulfoxide:** Chiralcel OD-H column: 90/10 hexane/*i*-PrOH; flow rate 1.0 mL/min;  $t_R = 11.0167$  min;  $t_R = 12.2667$  min.

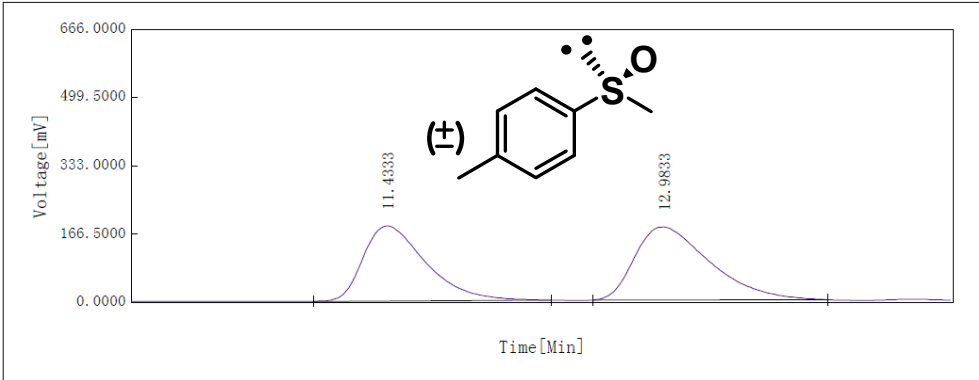

| Serial Number | Retention Time [min] | Area [mAbs*s] | Type | Area %  |
|---------------|----------------------|---------------|------|---------|
| 1             | 11.4333              | 4453.6962     | BB   | 49.6703 |
| 2             | 12.9833              | 4512.8149     | BB   | 50.3296 |
| The Total     |                      | 8966.5111     |      |         |

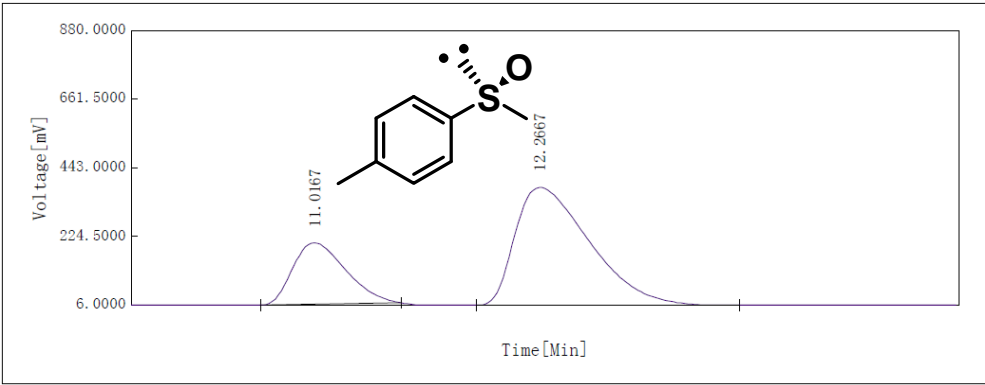

| Serial Number | Retention Time [min] | Area [mAbs*s] | Type | Area %  |
|---------------|----------------------|---------------|------|---------|
| 1             | 11.0167              | 4092.1742     | BB   | 27.1015 |
| 2             | 12.2667              | 11007.2847    | BB   | 72.8985 |
| The Total     |                      | 15099.4589    |      |         |



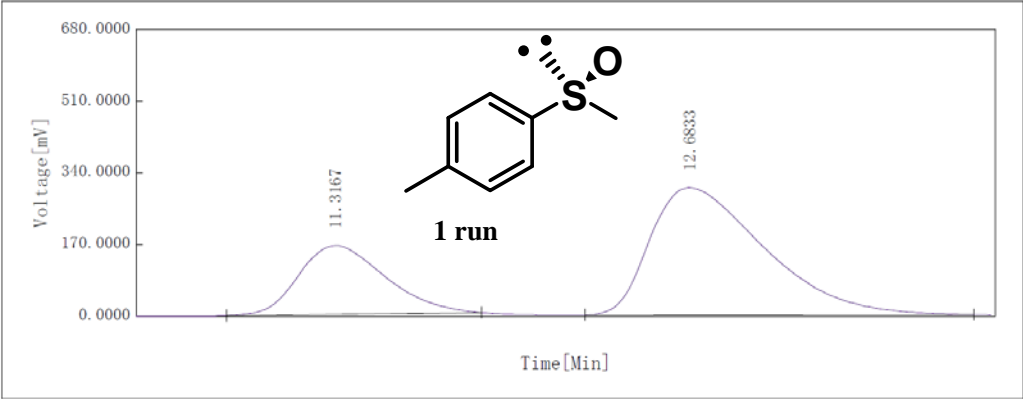

| Serial Number | Retention Time [min] | Area [mAbs*s] | Type | Area %  |
|---------------|----------------------|---------------|------|---------|
| 1             | 11.3167              | 3747.8805     | BB   | 28.8863 |
| 2             | 12.6833              | 9226.7189     | BB   | 71.1137 |
| The Total     |                      | 12974.5993    |      |         |

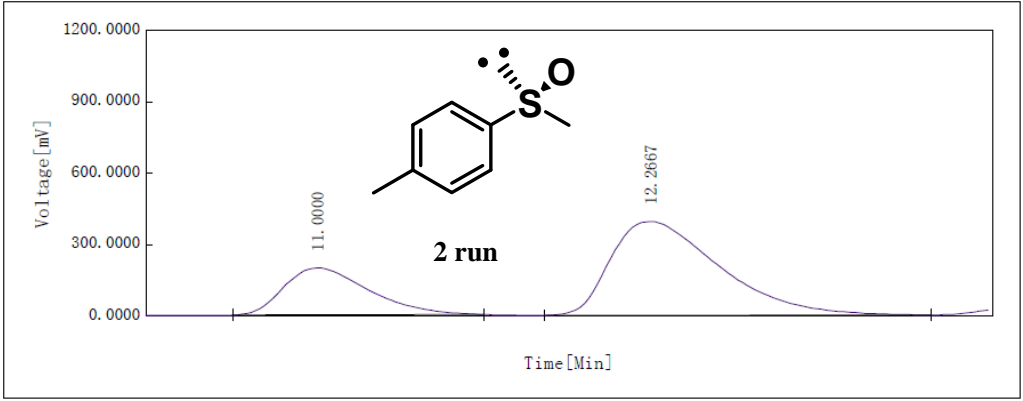

| Serial Number | Retention Time [min] | Area [mAbs*s] | Type | Area %  |
|---------------|----------------------|---------------|------|---------|
| 1             | 11.0167              | 4417.9786     | BB   | 28.1926 |
| 2             | 12.2667              | 11252.7204    | BB   | 71.8074 |
| The Total     |                      | 15670.6990    |      |         |

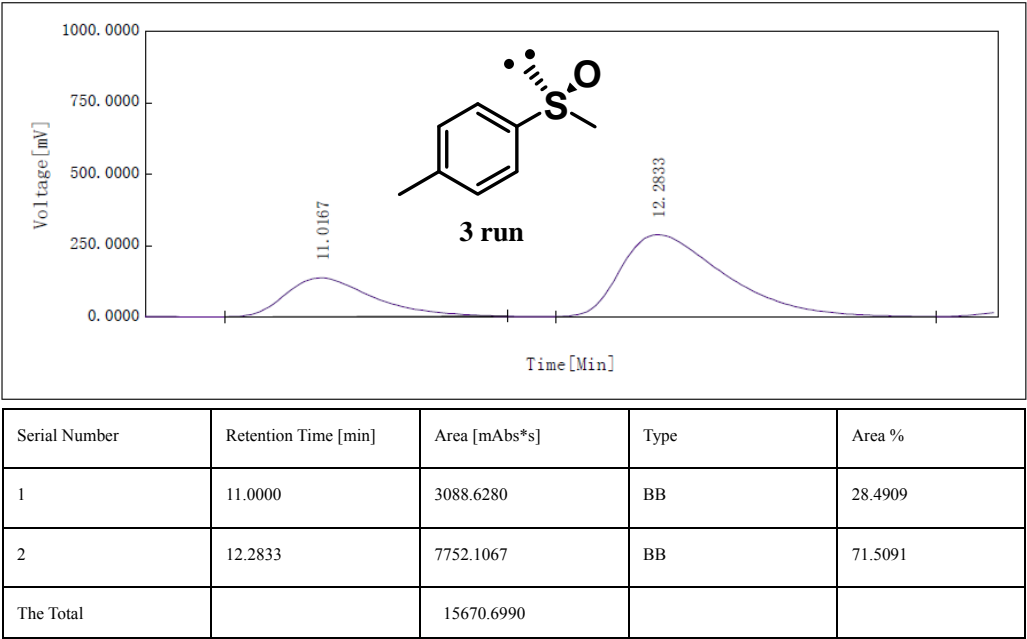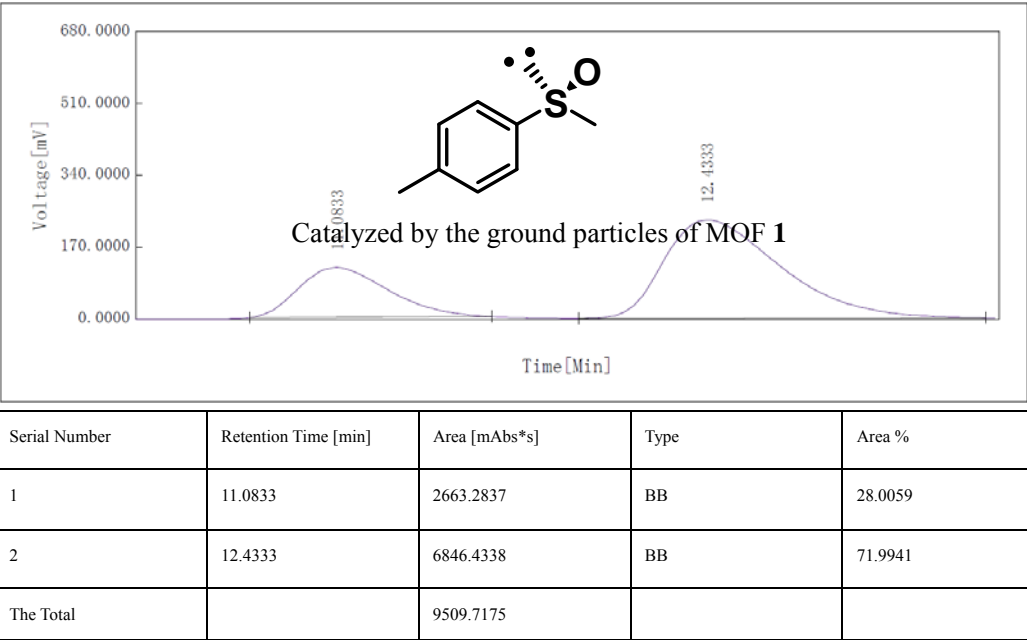

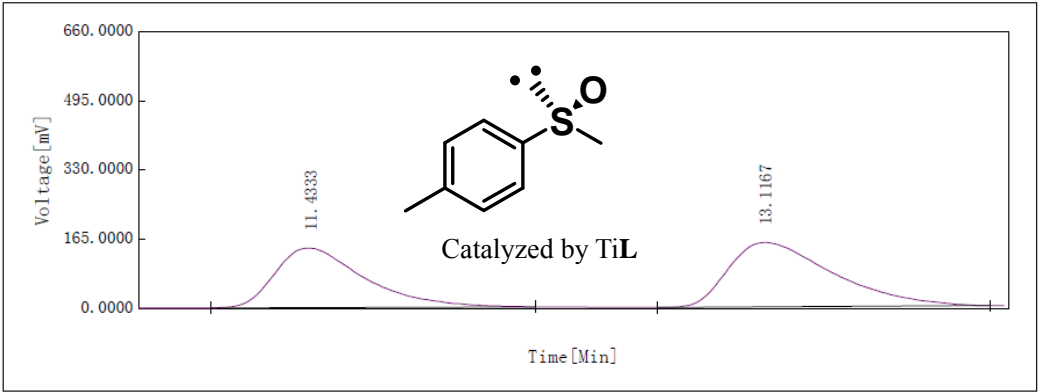

| Serial Number | Retention Time [min] | Area [mAbs*s] | Type | Area %  |
|---------------|----------------------|---------------|------|---------|
| 1             | 11.4333              | 3264.5932     | BB   | 44.0554 |
| 2             | 13.1167              | 4145.6135     | BB   | 55.9446 |
| The Total     |                      | 7410.2066     |      |         |

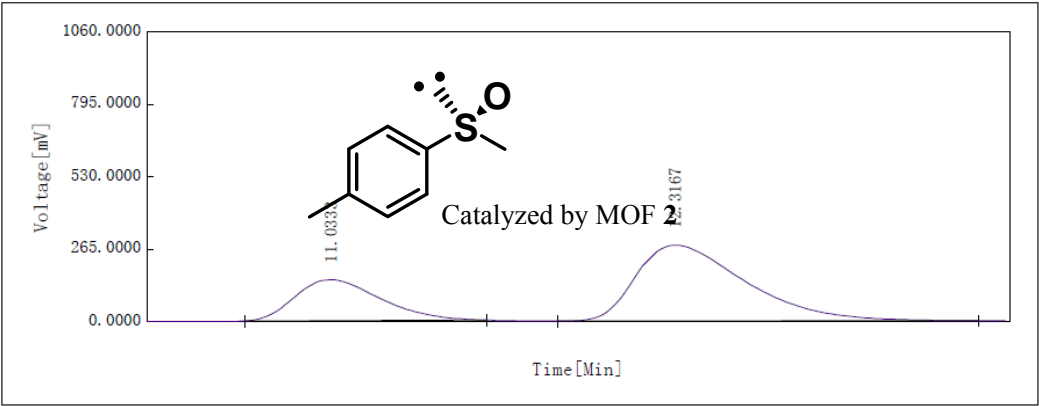

| Serial Number | Retention Time [min] | Area [mAbs*s] | Type | Area %  |
|---------------|----------------------|---------------|------|---------|
| 1             | 11.0333              | 3302.5542     | BB   | 29.5424 |
| 2             | 12.3167              | 7876.4923     | BB   | 70.4576 |
| The Total     |                      | 11179.0465    |      |         |

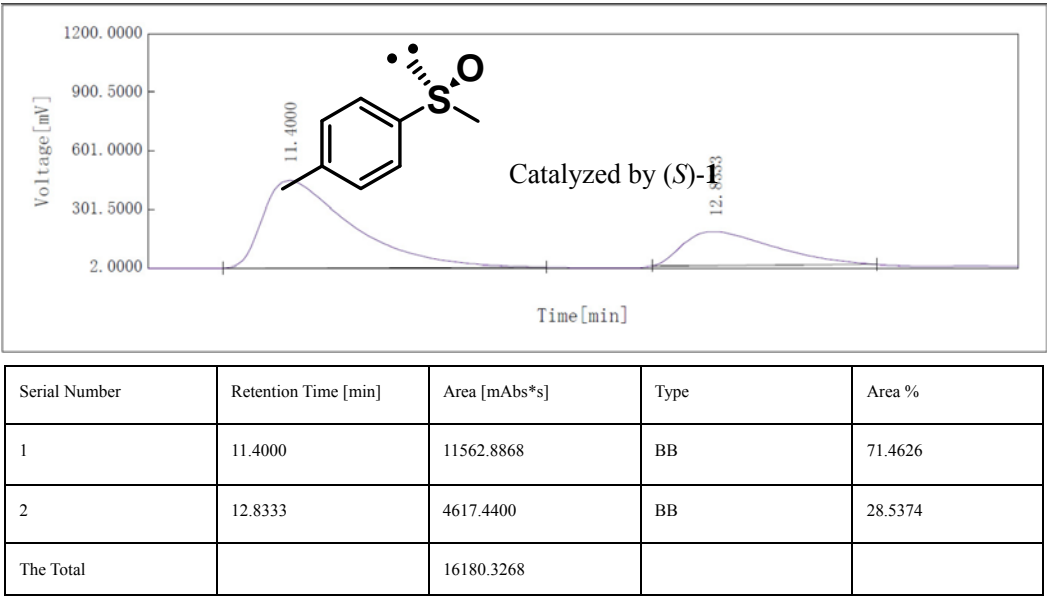

**Methyl 4-nitrophenyl sulfoxide:** Chiralcel OJ-H column: 80/20 hexane/i-PrOH; flow rate 1.0 mL/min;  $t_R = 29.2667$  min;  $t_R = 35.2000$  min.

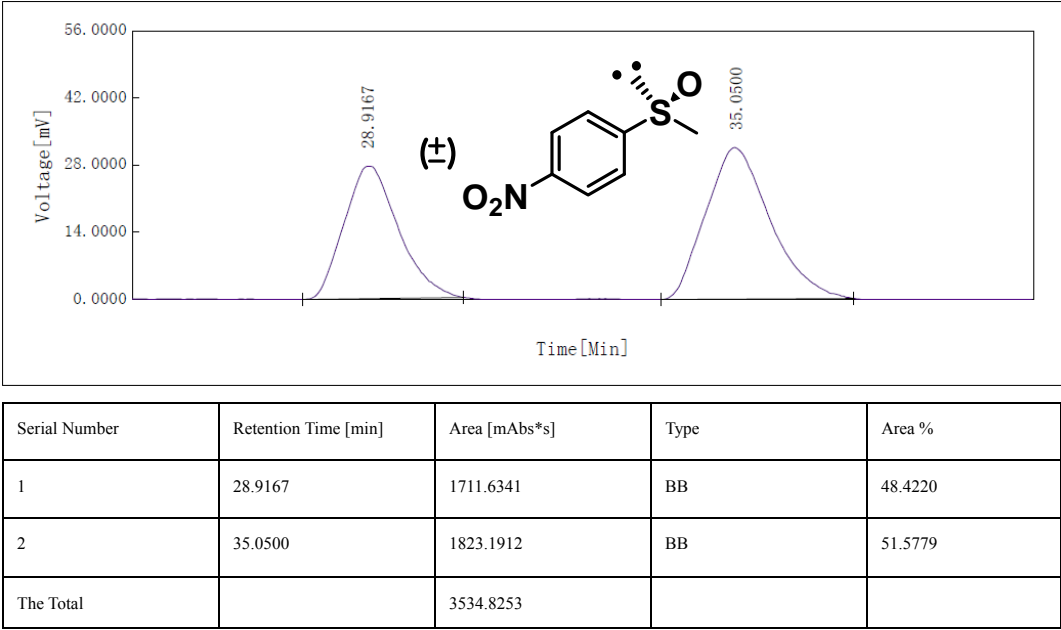

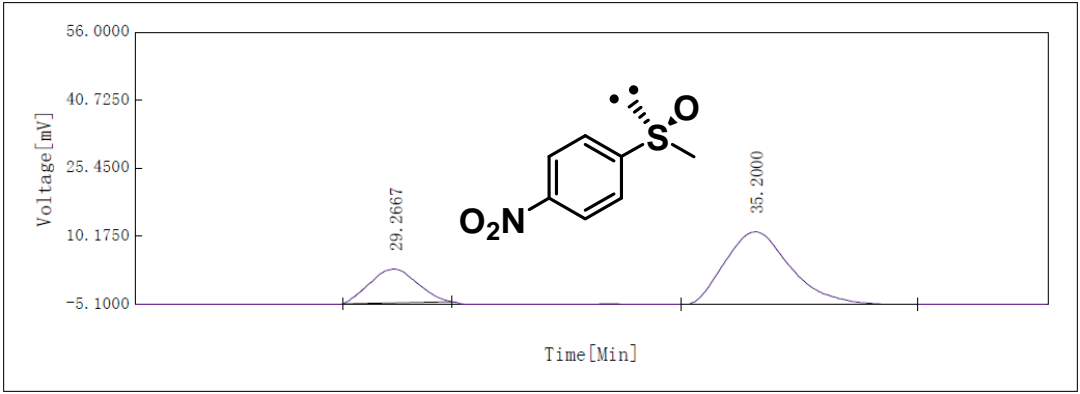

| Serial Number | Retention Time [min] | Area [mAbs*s] | Type | Area %  |
|---------------|----------------------|---------------|------|---------|
| 1             | 29.2667              | 406.4830      | BB   | 24.4663 |
| 2             | 35.2000              | 1254.9162     | BB   | 75.5337 |
| The Total     |                      | 1661.3992     |      |         |

**Methyl 4- methoxyphenyl sulfoxide:** Chiralcel OD-H column: 90/10 hexane/*i*-PrOH;  
flow rate 1.0 mL/min;  $t_R = 11.3167$  min;  $t_R = 11.7667$  min.

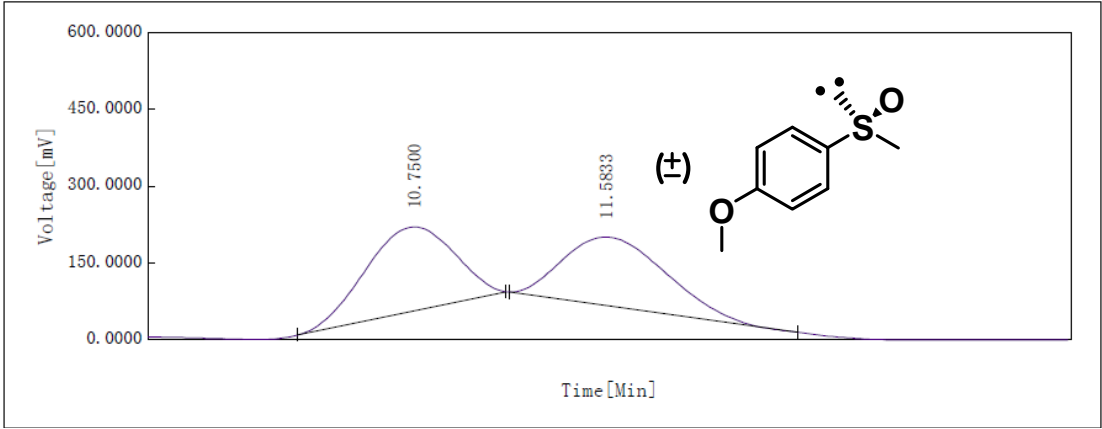

| Serial Number | Retention Time [min] | Area [mAbs*s] | Type | Area %  |
|---------------|----------------------|---------------|------|---------|
| 1             | 10.7500              | 4391.7692     | FF   | 51.3452 |
| 2             | 11.5833              | 4161.6543     | FF   | 48.6548 |
| The Total     |                      | 8553.4235     |      |         |

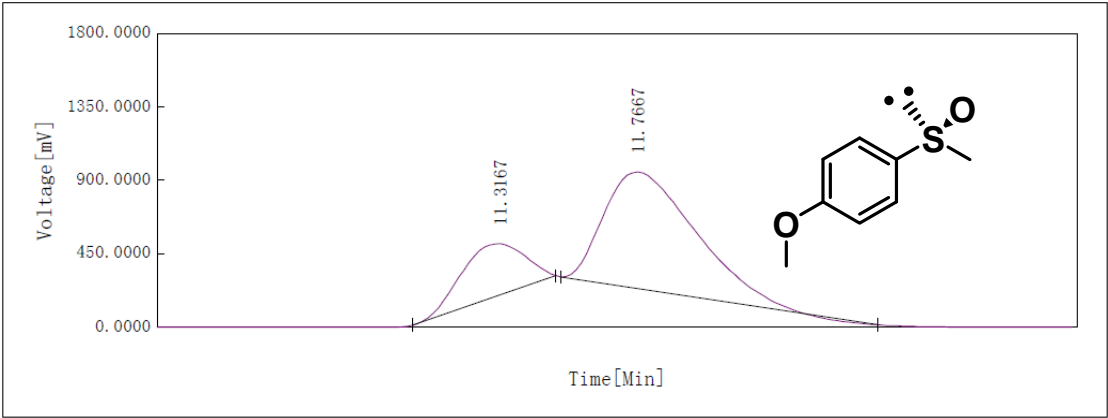

| Serial Number | Retention Time [min] | Area [mAbs*s] | Type | Area %  |
|---------------|----------------------|---------------|------|---------|
| 1             | 11.3167              | 4659.0584     | FF   | 23.7660 |
| 2             | 11.7667              | 14944.8227    | FF   | 76.2340 |
| The Total     |                      | 19603.8811    |      |         |

**Methyl 2-naphthyl sulfoxide:** Chiralcel OD-H column: 93/7 hexane/i-PrOH; flow rate 0.5 mL/min;  $t_R = 54.6833$  min;  $t_R = 62.3167$  min;

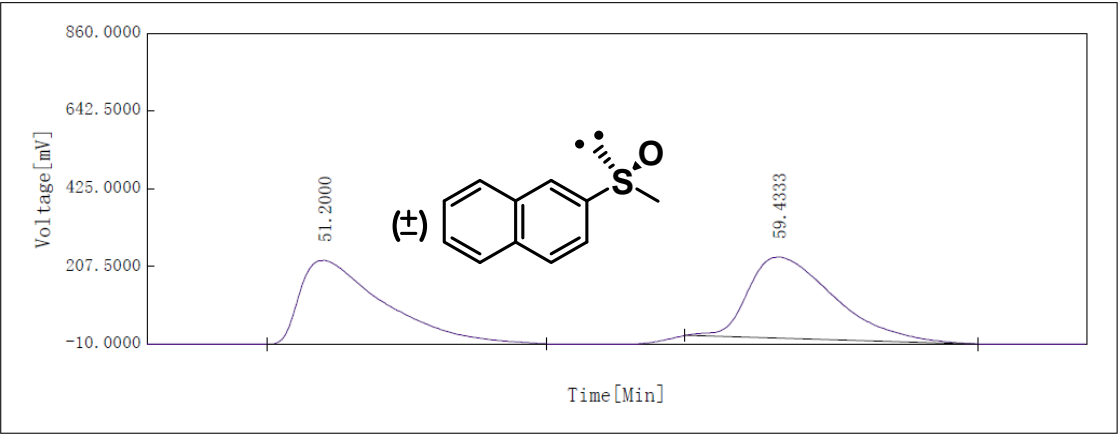

| Serial Number | Retention Time [min] | Area [mAbs*s] | Type | Area %  |
|---------------|----------------------|---------------|------|---------|
| 1             | 51.2000              | 24801.7832    | BB   | 50.4157 |
| 2             | 59.4333              | 24392.8230    | BB   | 49.5843 |
| The Total     |                      | 49194.6062    |      |         |

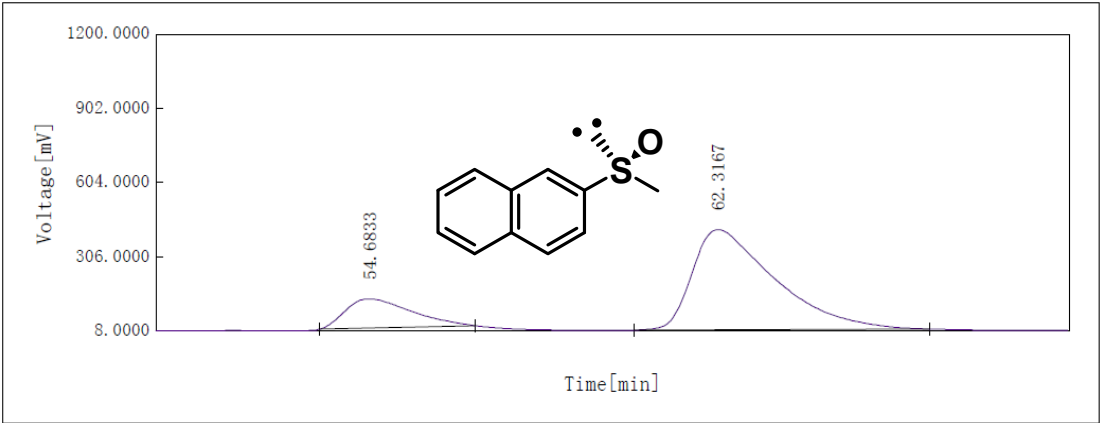

| Serial Number | Retention Time [min] | Area [mAbs*s] | Type | Area %  |
|---------------|----------------------|---------------|------|---------|
| 1             | 54.6833              | 11737.1926    | BB   | 19.0593 |
| 2             | 62.3167              | 19845.4043    | BB   | 80.9407 |
| The Total     |                      | 61582.5969    |      |         |

**Isopropyl phenyl sulfoxide:** Chiralcel OD-H column: 93/7 hexane/i-PrOH; flow rate 0.5 mL/min;  $t_R = 19.2333$  min;  $t_R = 23.7500$  min

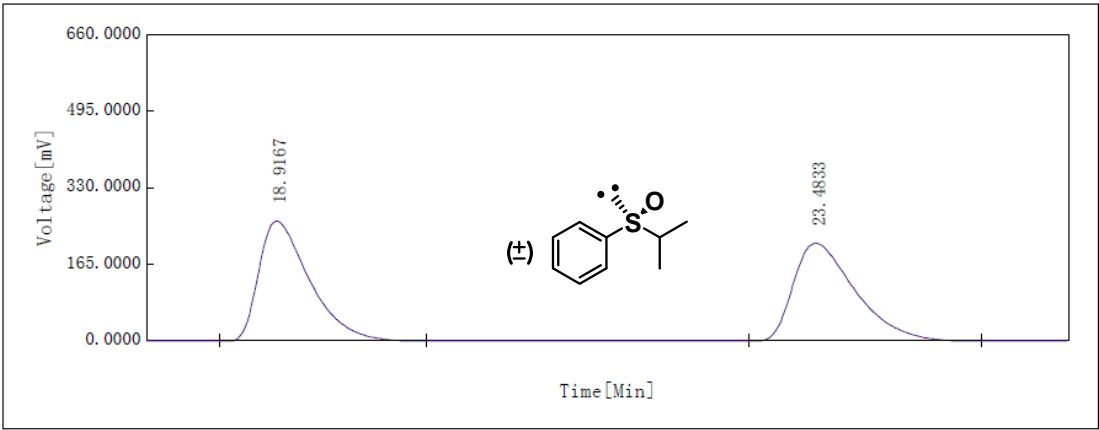

| Serial Number | Retention Time [min] | Area [mAbs*s] | Type | Area %  |
|---------------|----------------------|---------------|------|---------|
| 1             | 18.9167              | 7879.5464     | BB   | 49.9985 |
| 2             | 23.4833              | 7880.0256     | BB   | 50.0015 |
| The Total     |                      | 15759.5720    |      |         |

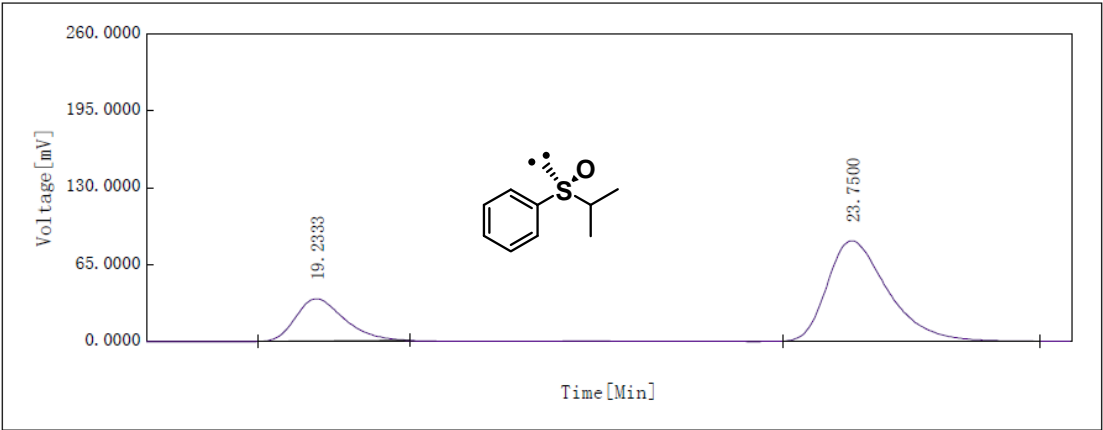

| Serial Number | Retention Time [min] | Area [mAbs*s] | Type | Area %  |
|---------------|----------------------|---------------|------|---------|
| 1             | 19.2333              | 1016.3851     | BB   | 25.3129 |
| 2             | 23.7500              | 2998.9061     | BB   | 74.6871 |
| The Total     |                      | 4015.2912     |      |         |

**Benzyl phenyl sulfoxide:** Chiralcel OD-H column: 90/10 hexane/i-PrOH; flow rate 1.0 mL/min;  $t_R = 24.0333$  min;  $t_R = 17.2167$  min

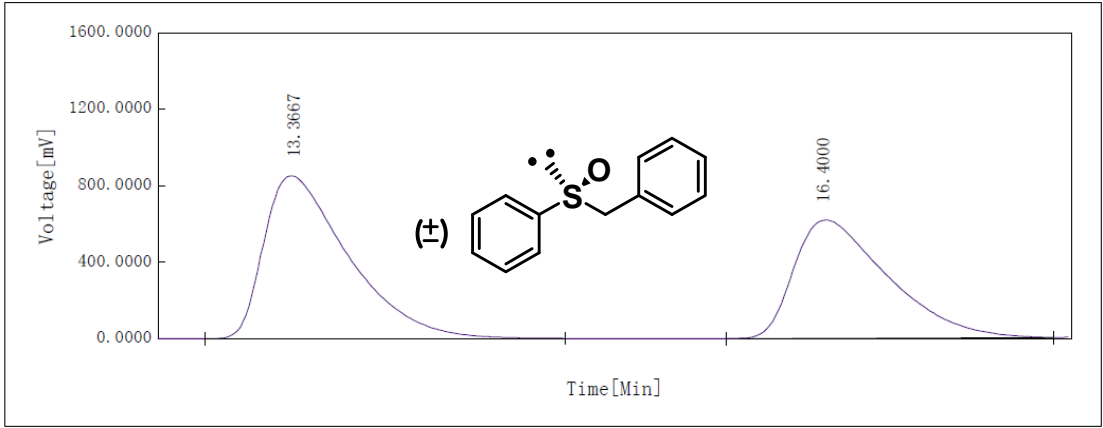

| Serial Number | Retention Time [min] | Area [mAbs*s] | Type | Area %  |
|---------------|----------------------|---------------|------|---------|
| 1             | 13.3667              | 28413.0710    | BB   | 52.0959 |
| 2             | 16.4000              | 26126.8469    | BB   | 47.9041 |
| The Total     |                      | 54539.9179    |      |         |



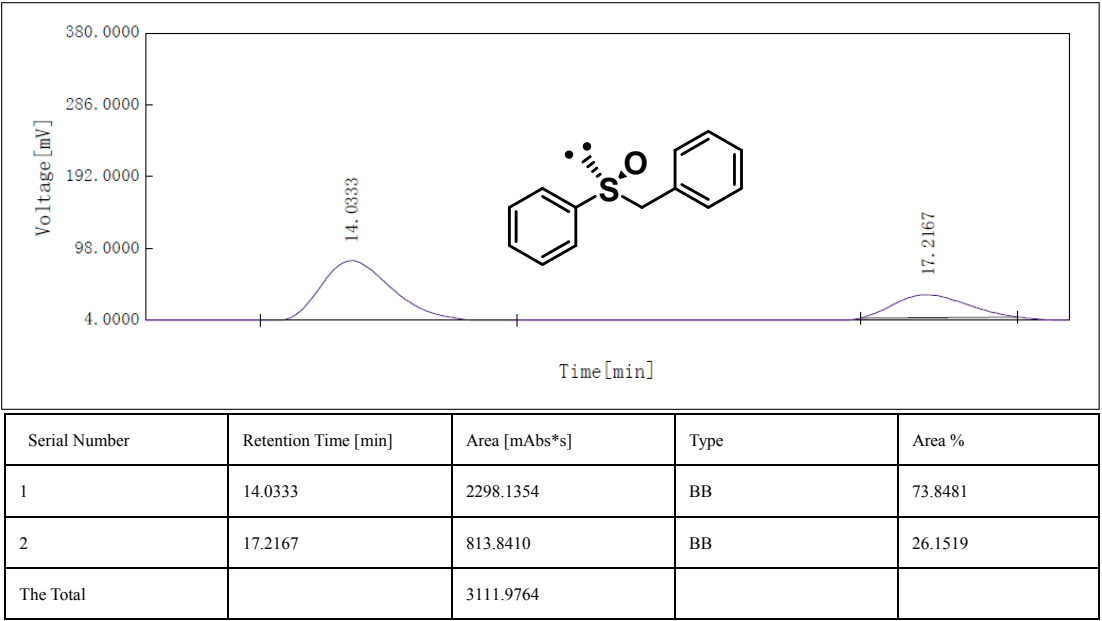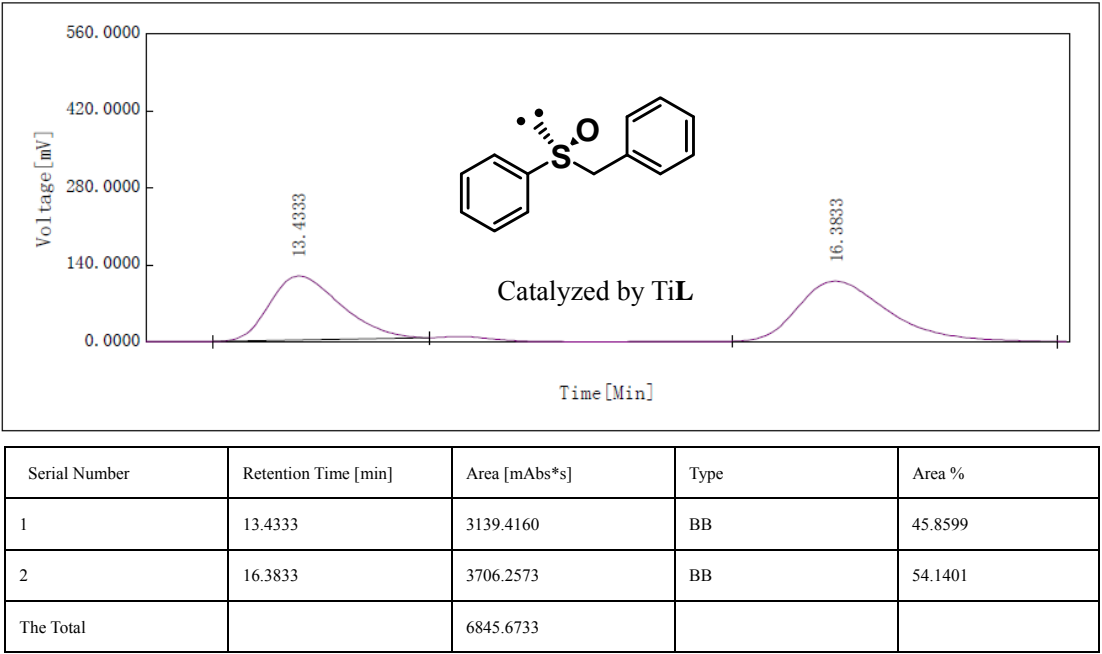

Supplement: c3cc43225d.pdf [file c3cc43225d.pdf]
